# 1 Assembly of a persistent apical actin network by the formin Frl/Fmnl tunes 2 epithelial cell deformability

3 Benoit Dehapiot<sup>1</sup>, Raphaël Clément<sup>1</sup>, Gabriella Gzásó-Gerhát<sup>2</sup>, Jean-Marc Philippe<sup>1</sup>, Thomas  
4 Lecuit<sup>1,3\*</sup>

---

5 1. Aix Marseille Université, CNRS, IBDM-UMR7288, Turing Center for Living Systems, 13009 Marseille, France

6 2. Institute of Genetics, Biological Research Centre, HAS, Szeged H-6726, Hungary

7 3. Collège de France, 11 Place Marcelin Berthelot, Paris, France

8 \*correspondance : thomas.lecuit@univ-amu.fr

## 9 Abstract

---

10 Tissue remodeling during embryogenesis is driven by the apical contractility of the epithelial  
11 cell cortex. This behavior arises notably from Rho1/Rok induced transient accumulation of non-  
12 muscle myosin II (MyoII pulses) pulling on actin filaments (F-Actin) of the medio-apical  
13 cortex. While recent studies begin to highlight the mechanisms governing the emergence of  
14 Rho1/Rok/MyoII pulsatility in different organisms, little is known about how the F-Actin  
15 organization influences this process. Focusing on *Drosophila* ectodermal cells during germband  
16 extension and amnioserosa cells during dorsal closure, we show that the medio-apical  
17 actomyosin cortex consists of two entangled F-Actin subpopulations. One exhibits pulsatile  
18 dynamics of actin polymerization in a Rho1 dependent manner. The other forms a persistent  
19 and homogeneous network independent of Rho1. We identify the Frl/Fmnl formin as a critical  
20 nucleator of the persistent network since modulating its level, in mutants or by overexpression,  
21 decreases or increases the network density. Absence of this network yields sparse connectivity  
22 affecting the homogeneous force transmission to the cell boundaries. This reduces the  
23 propagation range of contractile forces and results in tissue scale morphogenetic defects. Our  
24 work sheds new lights on how the F-Actin cortex offers multiple levels of regulation to affect  
25 epithelial cells dynamics.

## 26 Introduction

---

27 Animal cells can actively modify their shape in order to complete complex processes such as  
28 cell migration, division or cell shape changes during tissue morphogenesis. These behaviors  
29 arise from the contractile properties of the actomyosin cortex and its ability to build up tension  
30 by sliding MyoII molecular motors over anti-parallel arrays of crosslinked actin filaments<sup>1,2</sup>.

31 The recent advances in live imaging have shown that cortical contractility can occur in a  
32 pulsatile manner, by taking the form of local and transient accumulations of MyoII, known as  
33 MyoII pulses. This phenomenon was first described in the *C. elegans* zygote and has since been  
34 reported in many other species, in both embryonic and extra-embryonic tissues<sup>3-11</sup>. MyoII  
35 pulses can underly a variety of morphogenetic processes, ranging from single cell polarization  
36 to tissue scale remodeling. Although recent evidence suggests that MyoII pulses can emerge  
37 spontaneously from stochastic fluctuations and local amplification<sup>12-15</sup>, the spatio-temporal  
38 pattern of cortical contractility must be controlled in order to produce reproducible  
39 morphogenetic outcomes. In most studied systems, this control is achieved through the  
40 conserved RhoA GTPase signaling, which activate MyoII via Rho-associated kinase (ROCK)  
41 dependent phosphorylations of its regulatory light chain (MyoII-RLC)<sup>1,11,13,15,16</sup>.

42 Besides MyoII regulation, another key parameter influencing cortical contractility resides in  
43 actin filament network organization and dynamics. Typically, the cortex assembles as a thin  
44 network of actin filaments bound to the plasma membrane. The cortical network is both highly  
45 plastic and mechanically rigid and confer to the cells the ability to adapt and exert forces on  
46 their surrounding environment<sup>2,17-19</sup>. These remarkable properties stem from the action of more  
47 than a hundred actin binding proteins (ABPs) regulating the organization and the turnover of  
48 the network's components. In brief, actin nucleators, such as the Arp2/3 complex or the formin  
49 protein family, first promote the polymerization of filaments and can lead, depending on how  
50 they operate, to the assembly of networks harboring different levels of ramification (e.g. highly  
51 branched for Arp2/3 and sparse for the formins). After being assembled, the network  
52 organization can be remodeled by actin bundlers (Fascin, Plastin) or cross-linkers (Filamin,  $\alpha$ -  
53 Actinin) and its filament turnover regulated by factors like Profilin, capping proteins or  
54 ADF/Cofilin<sup>17-19</sup>. Past experimental and theoretical studies have shown that modulating the  
55 dynamic organization of F-Actin networks through ABPs, can significantly modify how the  
56 MyoII contractility gives rise to cortical tension<sup>2,20-22</sup>.

57 In embryonic *Drosophila* epithelial cells, the MyoII pulses appear in the medio-apical (also  
58 referred as medial) part of the cell and produce sustained apical constrictions or repeated cycles  
59 of apical contraction/relaxation. These two modalities of MyoII pulsatility, together with  
60 adherens junctions (AJs) remodeling, give rise to a variety of morphogenetic events such as  
61 mesoderm/endoderm invagination, convergent extension or tissue dorsal closure<sup>4,6,7</sup>. While the  
62 mechanisms underlying the emergence of MyoII pulsatility have been widely studied, little is

63 known however about how the medio-apical F-Actin supports the pulsatile cell contractility and  
64 allows spatial transmission of mechanical stresses. In mechanical terms, it has been shown that  
65 actin filaments transmit cortical tension over length scales that depend on viscoelastic  
66 properties of the cortex<sup>23</sup>. These properties emerge from the spatial organization and the  
67 temporal remodeling of the F-Actin networks which are regulated by ABPs. It has also been  
68 shown that the cortical F-Actin can affect the level of MyoII activation by serving as a scaffold  
69 for the motor-driven advection of regulators such as Rho1 and Rok<sup>13</sup> or for the recruitment of  
70 Rho1 inhibitors, such as RhoGAPs, required for pulse disassembly and pulsation<sup>15</sup>. Here,  
71 focusing on two highly pulsatile tissues, namely the ectodermal cells during germband  
72 extension (GBE) and amnioserosa cells during dorsal closure (DC), we first the regulation of  
73 the medio-apical F-Actin. We next sought to understand how the medial F-Actin network  
74 affects MyoII contractile forces within cells, and it supports the propagation of contractile  
75 tension to the surrounding tissue.

## 76 Results

---

### 77 Spatio-temporal dynamics of medio-apical F-Actin.

78 To monitor F-Actin dynamics, we stably expressed the actin binding domain of Utrophin fused  
79 to eGFP (eGFP::UtrCH) in living *Drosophila* embryos. This probe offers a good signal-to-noise  
80 ratio to observe isolated actin filaments and does not produce abnormal structures when  
81 comparing to phalloidin staining (Supplementary Fig. 1a)<sup>24</sup>. In ectodermal and amnioserosa  
82 cells, the medio-apical F-Actin forms a network of filaments that can be observed directly under  
83 the apical surface of the cell (Fig. 1a-c). In both tissues, the apical cortex was highly dynamic,  
84 displaying contractile foci of F-Actin (Supplementary Movies 1,2) and a constant turnover of  
85 its filaments (see single filament assembly and disassembly events in Fig. 1d and  
86 Supplementary Movies 3).

87 To understand how the cortex dynamics is influenced by the MyoII pulsed cortical contractility,  
88 we co-expressed the utrophin probe with a tagged version of the *Drosophila* MyoII-RLC  
89 (Sqh::mCherry or Sqh::mKate2) (Fig. 1e,f and Supplementary Movies 4,5). We first noticed  
90 that, contrary to MyoII, the medio-apical F-Actin network persists between cycles of apical  
91 constriction (see “no pulse” vs “pulse” in Fig. 1g) and still assembles in the rare non-contractile  
92 cells. While this observation suggests a decoupling between the assembly of the medial F-Actin  
93 and the emergence of pulsed contractility, we also noticed that the contractile foci of F-Actin

94 correlate with the appearance of MyoII pulses (see yellow frames Fig. 1e,f). Although this could  
95 stem from by the tendency of MyoII to advect material while contracting, the amount of F-  
96 Actin contained in these foci seems to exceed what one would expect from the simple  
97 concentration of molecules. Thus, to further investigate this phenomenon, we designed an  
98 automated cell segmentation and background subtraction procedure to carefully measure the  
99 actomyosin levels in the restricted medio-apical domain (see Methods and Supplementary Fig.  
100 1b,c). By comparing single cell intensity profiles (Fig. 1h,i) or by performing cross-correlation  
101 analysis (Fig. 1j), we found that the F-Actin and the MyoII levels are strongly correlated in time  
102 and peak together, with a maximum shift of a few seconds. Since our measurements were  
103 carried out on total integrated fluorescence intensities, this observation suggests that a surge of  
104 actin polymerization accompanies the formation of MyoII pulses. Overall, we concluded that  
105 medio-apical F-Actin exhibits two distinct behaviors. First, cells assemble a persistent network  
106 of actin filaments, in the form of a homogeneous network. Second, cells induce pulsatile F-  
107 actin polymerization in synchrony with MyoII pulses (see diagram in Fig. 1k).

### 108 **Rho1 pathway inhibition reveals two differentially regulated medio-apical F-Actin sub-** 109 **populations.**

110 To further characterize the mechanisms underlying medio-apical F-Actin dynamics, we  
111 inhibited MyoII pulsatility by targeting molecular components of the Rho1 signaling pathway  
112 (Fig. 2a). We tested whether the pulsatile accumulation of F-Actin and MyoII is co-regulated  
113 with or decoupled from the mechanisms promoting the assembly of the persistent network. We  
114 first focused on ectodermal cells during GBE and designed two different strategies to inhibit  
115 Rho1. In the first case, we injected the C3-transferase, a well characterized Rho1  
116 inhibitor<sup>13,25,26</sup>, in pre-gastrulating embryos just before the end of cellularization. This timing  
117 allowed the C3-transferase to penetrate the cells (because of its low cell-permeability) while  
118 not drastically perturbing the early steps of gastrulation (e.g. mesoderm/endoderm  
119 invagination). In the second case, we generated maternal/zygotic null mutant embryos for  
120 *RhoGEF2* with germline clones (see Methods). *RhoGEF2* encodes a Rho guanine nucleotide  
121 exchange factors (RhoGEFs) which is believed to be the main if not the sole GEF activating  
122 Rho1 in the medio-apical cortex of embryonic *Drosophila* epithelial cells<sup>16,27,28</sup>. In both cases,  
123 we achieved a complete loss of medial MyoII pulsatility, resulting in cell and tissue  
124 abnormalities (see apical rounding and AJs lowering in Fig. 2b and Supplementary Movie 6).  
125 Despite very strong inhibition of MyoII we also noticed that the persistent network was



126 preserved in both C3-transferase injected and *RhoGEF2*<sup>-/-</sup> embryos (Fig. 2b). Indeed, by  
127 measuring the mean levels, we found that, the average medial F-Actin density was only slightly  
128 reduced under these inhibitory conditions (Fig. 2c). This shows that the persistent network  
129 assembly does not rely on the mechanisms promoting the cortical pulsed contractility.

130 We next tested the impact of Rho1 pathway inhibition on F-Actin polymerization during MyoII  
131 pulses. To this end, we monitored single cell total fluorescence intensity profiles and quantified  
132 the standard deviation as a proxy to measure pulsatility (Fig. 2d,e). Note that we processed  
133 these profiles with a high-pass filter to eliminate the low frequency components and isolate the  
134 effect of pulses in our measurements (see Methods and Supplementary Fig. 1d). Following this  
135 method, we found that, like the apical cell area and MyoII intensity, the fluctuations of medial  
136 F-Actin levels were significantly reduced upon Rho1 pathway inhibitions (Fig. 2f). These  
137 results demonstrate that, contrary to the persistent network, the pulsatile pool of medial F-Actin  
138 is chiefly regulated by Rho1 signaling.

139 In a second step, we pursued our investigations by focusing on amnioserosa cells during DC  
140 and asked whether a differential regulation of the medio-apical F-Actin is also present in this  
141 tissue. However, since the C3-transferase is not membrane permeable and *RhoGEF2*<sup>-/-</sup> embryos  
142 were unable to reach such a late embryonic stage due to earlier requirements, we used alternate  
143 strategies. We first took advantage of the salt and pepper expression pattern of *engrailed*-GAL4  
144 (en-GAL4) in the amnioserosa to drive the over-expression of a Rho1 dominant negative form,  
145 UAS-Rho1N19, in randomly located amnioserosa cells. To identify these over-expressing cells,  
146 we recombined the en-GAL4 driver with a fluorescent nuclear marker, UAS-NLS::RFP, to act  
147 as a reporter of expression (see Methods and Fig. 3b). We observed that, as expected when  
148 MyoII is inhibited, the cells over-expressing Rho1N19 did not undergo pulsed contractility (see  
149 yellow ROI in Fig. 3a and Supplementary Movie 7). Strikingly, as in ectodermal cells during  
150 germband extension, our quantifications revealed that only the pulsatile pool of F-Actin, and  
151 not the persistent network, was perturbed upon Rho1 inhibition (see similar medial F-Actin  
152 density in Fig. 3c and reduced medial F-Actin pulsatility in Fig. 3d). These results establish  
153 that, in both ectodermal and amnioserosa cells, the medio-apical F-Actin network consists of  
154 two independently regulated but entangled pools of filaments. On one hand, a pulsatile pool of  
155 F-Actin polymerizing under the control of Rho1 signaling and, on the other hand, a persistent  
156 network whose assembly does not depend on this pathway (see diagram Fig. 3h).

157 In a last experiment, we wanted to know if the emergence of medial F-Actin pulsatility was  
158 dependent on MyoII activation. To do so, we inhibited the Rho associated kinase (Rok) in  
159 amnioserosa cells, by injecting the cell-permeable H-1152 compound<sup>13</sup> in embryos at the DC  
160 stage. Interestingly, while these injections were successful to inhibit MyoII pulses and the apical  
161 cell contractility, our quantifications revealed that both the persistent network and the pulsatile  
162 polymerizations of F-Actin were preserved in this condition (Fig. 3e-g and Supplementary  
163 Movie 8). The dynamics of F-Actin pulses was however modified upon Rok inhibition, with  
164 pulses tending to last longer and be larger than in controls (see yellow frames in Fig. 3e).  
165 Although these changes likely reflect the role of MyoII contractility in shaping pulses of F-actin  
166 polymerization, we conclude that the emergence, *per se*, of such pulses does not rely on  
167 Rok/MyoII activity itself. Overall Rho1 signaling is responsible for both MyoII and F-Actin  
168 pulsatility but uses different downstream effectors (see diagram Fig. 3h).

### 169 **The Frl formin promotes the persistent F-Actin network assembly.**

170 While our results clearly demonstrated the role of Rho1 signaling in the emergence of medial  
171 F-Actin pulsatility, the mechanisms underlying assembly of the medial apical actin network in  
172 the early germband and in the amnioserosa are unknown. We performed an shRNA screen to  
173 identify the factor(s) responsible for the persistent network assembly. Since the network density  
174 is relatively low, we focused our efforts on the actin nucleators of the formin family, known to  
175 promote the assembly of sparse F-Actin networks<sup>17</sup>. By first looking at the actomyosin  
176 dynamics in amnioserosa cells, we noticed that a down-regulation of the Frl/Fmnl formin leads  
177 to a clear loss of medial F-Actin density in the time interval between two MyoII/F-Actin pulses  
178 (see “no pulse” vs “pulse” in Fig. 4a and Supplementary Movie 9). This result led us to consider  
179 Frl as a good candidate for the persistent network assembly and to further investigate its  
180 function in both ectodermal (GBE) and amnioserosa cells (DC).

181 First, to confirm our loss of function phenotype, we produced a null allele of *frl* (*frl*<sup>59</sup>) by  
182 adopting a CRISPR deletion strategy (see Methods). While this allele revealed to be semi-lethal  
183 and semi-sterile, we succeeded to cross homozygote parents (*frl*<sup>59/59</sup>) and obtained  
184 maternal/zygotic null embryos. In a complementary approach, we also studied the effect of a  
185 Frl gain of function by overexpressing a UAS-Frl<sup>wt</sup> construct using a 67-GAL4 driver (condition  
186 referred as Frl<sup>OE</sup>). In both tissues, we observed that the expression level of Frl affects the  
187 persistent actin network density: the panels in Fig. 4b,c indicated “no pulse” show the reduced  
188 network density in *frl*<sup>59/59</sup> mutants and the increased network density in Frl<sup>OE</sup> embryos (see also

189 [Supplementary Movies 10,11](#)). Furthermore, as we will further describe below, we also found  
190 that Frl influences the pulsatile pool of F-Actin, especially in amnioserosa cells, by reducing  
191 the amplitude of pulses (the more Frl, the weaker pulses). In light of this observation, we  
192 carefully designed our quantification methods to measure the persistent network density,  
193 considering that both the persistent network and the pulsatile pool account for the medial F-  
194 Actin levels and that Frl affects these two sub-populations. We first looked at the distribution  
195 of the medial F-Actin density and compared the relative changes between conditions ([Fig. 4d,e](#)).  
196 Modulating the Frl expression induced a shift in the medial F-Actin density distributions,  
197 towards lower values in *frl*<sup>59/59</sup> mutants and towards higher values in Frl<sup>OE</sup> embryos ([Fig. 4d,e](#),  
198 arrows above the graphs), consistent with a decrease or an increase of the persistent network  
199 density.

200 Next, to address how Frl levels influence the persistent network density independent of its  
201 contribution to the pulsatile pool of F-Actin, we monitored single cell mean fluorescence  
202 intensity profiles for the MyoII/F-Actin and selected the 20 % time-points for which the MyoII  
203 signal was the lowest ([Fig. 4f](#)). Considering these time-points as inter-pulses period, we then  
204 measured and averaged the corresponding mean F-Actin levels (F-Actin baseline) and observed  
205 that, in both tissues, lowering the Frl levels induced a reduction of medial F-Actin density while  
206 overexpressing Frl produced the opposite effect ([Fig. 4g](#)). These results confirm that Frl plays  
207 a pivotal role in the persistent network assembly in ectodermal and amnioserosa cells.

### 208 **Frl antagonizes Rho1-induced medial pulsed contractility.**

209 To better characterize how modulating the Frl levels also influences the pulsatile pool of F-  
210 Actin and the medio-apical contractility in general we monitored the medio-apical actomyosin  
211 levels and the apical cell area fluctuations by looking at the standard deviations of high-pass  
212 filtered single cell profiles ([Fig. 5a-d](#) and [Supplementary Movies 12,13](#)). In amnioserosa cells,  
213 the loss of the Frl (*frl*<sup>59/59</sup>) resulted in a clear increase of both the MyoII/F-Actin and the apical  
214 cell area fluctuations. In contrast, its overexpression (Frl<sup>OE</sup>) produced the opposite effect ([Fig.](#)  
215 [5d](#)). We observed similar tendencies in ectodermal cells, albeit to a lower extent ([Fig. 5c](#)).  
216 Taken together these quantifications showed that, beyond its role in the persistent network  
217 assembly, Frl counteracts the medial actomyosin pulsatility and the apical cell surface  
218 deformation.

219 We further tested whether the effect on pulsation is cell autonomous or whether it involves cell  
220 interactions. As we did with Rho1N19 (see [Method](#) and [Fig. 3a](#)), we overexpressed Frl using  
221 the *engrailed*-GAL4 driver to see if the Frl effect on the pulsed contractility can be obtained in  
222 isolated amnioserosa cells ([Fig. 5e](#) and [Supplementary Movie 14](#)). We observed that cells  
223 overexpressing Frl displayed an increased persistent network density (see distribution shift in  
224 [Fig 5f](#)) and a reduced F-Actin pulsatility and apical cell area fluctuations ([Fig. 5g](#)). This  
225 experiment confirmed that Frl antagonizes the medial actomyosin pulsatility and that this effect  
226 occurs cell autonomously.

227 We then asked whether Frl influences the actomyosin pulsatility by modulating the level of  
228 Rho1 activity (Rho1GTP) during pulses. To address this question, we monitored the medio-  
229 apical localization of the Rho1 binding domain of anillin fused to eGFP (AniRBD::eGFP) in  
230 amnioserosa cells. This construct acts as a sensor to follow Rho1 activity *in vivo* since it  
231 specifically binds to the GTP bound form of Rho1<sup>13,29</sup>. We next combined the sensor with a 67-  
232 Gal4 driver to either overexpress a UAS driven shRNA (Frl<sup>shRNA</sup>) or the UAS-Frl<sup>wt</sup> construct  
233 (Frl<sup>OE</sup>) in embryos ([Fig. 5h](#) and [Supplementary Movies 15](#)). We observed and measured (see  
234 [Methods](#), [Supplementary Fig. 2a](#) and [Supplementary Movies 16](#)) that reducing the Frl levels  
235 enhanced the amplitude of AniRBD::eGFP pulses while overexpressing the formin led to the  
236 opposite effect ([Fig. 5i,j](#)). This allowed us to conclude that Frl significantly affects the apical  
237 cell contractility by modulating the levels of Rho1 activation.

238 Overall, we conclude that tuning the Frl levels act as a switch between two distinct modes of  
239 medio-apical contractility. At zero/low level of Frl (*frl*<sup>59/59</sup> and Frl<sup>shRNA</sup>) the persistent network  
240 is seriously weakened and the actomyosin pulses have an increased amplitude. Consequently,  
241 cells undergo more pronounced cell shape changes. In sharp contrast, the cells overexpressing  
242 Frl are more static, showing a low contractility and a dense persistent network (see diagram  
243 [Fig. 5k](#)).

#### 244 **Cellular and tissue scale effects of Frl loss or gain of function.**

245 We next wanted to know if changes in cellular behavior observed following the modulation of  
246 the Frl levels can in turn influence the overall tissue dynamics. To answer this question, we first  
247 monitored ectodermal cells undergoing convergent extension (GBE) by segmenting cells  
248 individually ([Fig. 6a](#) and [Supplementary Movie 17](#)). Since convergent extension is driven by  
249 cell intercalation (T1 events) and that cell intercalation itself is powered by MyoII pulses<sup>7,30,31</sup>,

250 we tracked T1 events and monitored cell area fluctuations as a read out of pulsatility. Our  
251 measurements revealed that ectodermal cells intercalate and fluctuate more in *frl*<sup>59/59</sup> mutants  
252 and less in Frl<sup>OE</sup> than in control embryos (see inserted time projection in Fig. 6a and  
253 quantifications in Fig. 6b,c). In general, the occurrence of T1 events and the intensity of apical  
254 cell area fluctuations are positively correlated across conditions (Pearson coefficient = 0.61,  
255 sig.  $6.1 \times 10^{-6}$ , Fig. 6d). This suggests that active fluctuations favor T1 events and that Frl, by  
256 tuning these fluctuations locally, can impact the germband dynamics at the tissue scale.  
257 Interestingly, while increasing cell intercalation (*frl*<sup>59/59</sup>) does not speed up germband extension  
258 reducing the occurrence of T1 events (Frl<sup>OE</sup>) slows it down (assessed by following the posterior  
259 mid gut in DIC movies, see Fig. 6e,f and Supplementary Movie 18). This observation is  
260 consistent with previous reports that reducing cell intercalation, using other mutant conditions  
261 (e.g. *eve* mutants, Toll2, 6, 8 RNAi), impaired germband extension<sup>32,33</sup>.

262 In a second step, we studied how modulating the Frl levels affects tissue dorsal closure. As we  
263 have seen before, the Frl mutant phenotype is particularly pronounced in amnioserosa cells, as  
264 a lack of Frl induces a strong increase of actomyosin pulsation and apical cell area fluctuations  
265 (see Fig. 5). We also noticed that modulating the Frl levels changes the way cells deform, with  
266 cells in the *frl*<sup>59/59</sup> condition being more irregularly shaped than in control and, even more so,  
267 than in Frl overexpressing embryos (see time projected cell boundaries in Fig. 6g and  
268 Supplementary Movie 19). Using convex hull (see Methods and Fig. 6h) we measured that cells  
269 present indeed more inward and outward convolutions in the Frl loss of function than in the  
270 other conditions (see Fig. 6i). Since amnioserosa cells provide the main forces necessary to  
271 complete dorsal closure<sup>34,35</sup>, we assumed that these local modification of the cellular behavior  
272 could underlie dorsal closure defects. We therefore imaged embryos at a lower magnification  
273 and measured the time elapsed between the end of germband retraction and the complete lateral  
274 epidermis closure (Fig. 6j,k and Supplementary Movie 20). By comparing control and Frl  
275 shRNA expressing embryos (Frl<sup>shRNA</sup>), we found that down-regulating Frl induces tissue scale  
276 defects and slows down closure by ~15% (Fig. 6l). It appeared that in many Frl<sup>shRNA</sup> embryos  
277 dorsal closure occurs only from the posterior side and not from both posterior and anterior sides  
278 like in controls (see white arrows in Fig. 6l). We suggest that despite reinforcing pulsatility, the  
279 reduction of Frl levels (Frl<sup>shRNA</sup>) increases cell deformability and could also impair the  
280 capability of amnioserosa cells to efficiently propagate contractile forces across junctions and  
281 pull on the lateral ectoderm. In other words, Frl may be required for generate an effective large-  
282 scale tissue tension. This could be explained by the fact that reducing the persistent network

283 density leads to an overall decrease of apical cortex stiffness, known to increase drastically right  
284 at the onset of dorsal closure in WT embryos<sup>36</sup>.

### 285 **The persistent network promotes the propagation of MyoII-induced contractile forces.**

286 This led us to address how the persistent network the propagation of contractile forces in the  
287 tissue. To that end, we focused on the amnioserosa cells, where the modulation of Frl levels  
288 had the strongest phenotypic consequences. We observed that pulses tend to contract the whole  
289 apical surface in control cells while, in *frl*<sup>59/59</sup> cells, they exert contractile forces mostly on their  
290 close surroundings where pulsatile F-Actin is dense (Fig. 7a). This is especially striking when  
291 a pulse travels through the mutant cells, only contracting nearby AJs (Supplementary Movie  
292 21). As a result, pulses in the *frl*<sup>59/59</sup> mutant generally do not affect the distant parts of the cell,  
293 except when some sparse radial filaments, emitted by the pulse itself, connect to the AJs (Fig.  
294 7b). This can lead to surprising deformation dynamics, with distant AJs expanding while nearby  
295 AJs are contracting (Fig. 7a). Together, these results suggest that F-Actin supports the  
296 transmission of contractile forces between pulses and AJs. In control cells, the homogeneous  
297 persistent network distributes evenly contractile forces to the periphery while, in *frl*<sup>59/59</sup> cells,  
298 the lack of this network leads to a heterogenous transmission of these forces (Fig. 7c). This is  
299 consistent with our previous quantification of increased deformation heterogeneity in *frl*<sup>59/59</sup>  
300 cells (Fig. 6j-l).

301 Next, to further characterize how the heterogeneity of F-Actin distribution impacts pulsed  
302 contractility, we measured the distance at which contractile forces propagate within the cell and  
303 tissue. To do so, we performed a KLT analysis measuring the speed at which tracked apical F-  
304 Actin structures move towards the pulse as a function of their distance to the pulse. (see Fig.  
305 7d, Methods, Supplementary Fig. 2b,c, and Supplementary Movie 22). After binning results  
306 according to distance, we were able to produce speed propagation curves and compare  
307 measurements between conditions (Fig. 7e). In all cases, speeds were higher near the pulse and  
308 decayed gradually with the distance. However, we observed that the decay length is strikingly  
309 shorter in *frl*<sup>59/59</sup> cells than in controls, despite the fact that we actually measured higher speeds  
310 at close range in mutant cells. This results in a crossover between the *frl*<sup>59/59</sup> and control curves.  
311 Note however that such a crossover was not present between Frl<sup>OE</sup> and control cells, although  
312 contraction amplitudes were different. These results indicate that the homogeneous persistent  
313 network promotes propagation of contractile forces at longer range.



314 We first reasoned that the F-Actin network behaves as a continuous material and the shorter  
315 decay length observed in *frl*<sup>59/59</sup> cells might result from a reduction of the so-called  
316 hydrodynamic length. Indeed, mechanical information typically does not propagate beyond this  
317 length, which is the distance within reach before internal dissipation occurs<sup>23</sup>. In a viscoelastic  
318 scenario, this distance increases with stiffness. This is consistent with our observations, as  
319 *frl*<sup>59/59</sup> cells display an overall reduction of F-Actin density, which is likely to reduce the  
320 effective stiffness. However, the time required to propagate over the hydrodynamic length is  
321 typically the dissipation timescale. In F-Actin networks, dissipation is highly influenced by  
322 filaments turnover which have been measured to occur over timescales no shorter than 10s, and  
323 possibly more<sup>37-39</sup>. We did not observe such contraction delay between local and distant regions  
324 of the cell ([Supplementary Fig. 2d](#)). Within the propagation range, contractions occur almost  
325 simultaneously. This rule out the hypothesis wherein *Frl* tunes the propagation range by  
326 affecting the hydrodynamic length.

327 We next reasoned that heterogeneity of connectivity to distant AJs might reduce the propagation  
328 range of contractile forces. To test this hypothesis, we designed a numerical model in which the  
329 cell boundary is discretized (see [Methods](#) and [Supplementary Fig. 2e](#)). The pulse position is  
330 chosen randomly, and a contraction force directed towards the pulse is applied to elements of  
331 the cell boundary. To consider the variable connectivity of the network, we assume that the  
332 probability for an element of the boundary to be connected to the pulse (and thus to directly  
333 undergo the contractile force) decays on a length scale  $\lambda$  with the distance  $d$  to the pulse,  
334  $p \sim e^{-d/\lambda}$ . This view is reminiscent of percolation systems in which the size of connected  
335 subregions increases with density<sup>40</sup>. Clearly,  $\lambda$  should be small in a low connectivity situation  
336 (*frl*<sup>59/59</sup> cells), when there is no persistent network. Yet even in this scenario, a distant element  
337 has a non-zero probability to be connected to the pulse, consistent with our observations of  
338 sparse radial filaments in *frl*<sup>59/59</sup> cells. In contrast,  $\lambda$  should increase when the network density  
339 increases (WT and *Frl*<sup>OE</sup> cells), so that when  $\lambda$  is large enough, the whole cell boundary is  
340 eventually connected to the pulse.

341 First, our model recapitulates the cell contraction phenotypes observed in the different  
342 conditions ([Fig. 7f](#) and [Supplementary Movie 23](#)). When  $\lambda$  is small, force is mostly transmitted  
343 to proximal boundary regions, and connection to distant AJs is very sparse. As a result,  
344 contraction is heterogeneous, and possibly leads to local expansion in distant regions due to  
345 area constraints. When  $\lambda$  increases, both connectivity and contraction become more

346 homogeneous. Consequently,  $\lambda$  directly impacts the shape of contracting cells, and simulations  
347 with a small value of  $\lambda$  lead to more convoluted cell shapes, as previously observed for *frl*<sup>59/59</sup>  
348 cells (compare simulations in Fig. 7g and actual *in vivo* measurements in Fig. 6j-l). In  
349 simulations, we also observe that variability is much higher when  $\lambda$  is small (Fig. 7g). This  
350 directly results from the stochastic nature of the low connectivity regime, in which only a  
351 random subset of boundary elements is connected. The more boundary elements are connected  
352 to the pulse, the more reproducible the deformation pattern becomes. Interestingly, variability  
353 was also much higher in *frl*<sup>59/59</sup> cells than in control cells (Fig. 6i), which further indicates  
354 sparse, random connectivity to AJs. Second, we averaged the movement towards the pulse as a  
355 function of the distance to the pulse for a wide range of  $\lambda$  (Fig. 7h). This recapitulated  
356 qualitatively the observations of Fig. 7e, in particular the crossover between propagation curves  
357 at low  $\lambda$ . Interestingly, when  $\lambda$  increases beyond cell size, connectivity eventually saturates,  
358 and no more crossovers occur between curves of high  $\lambda$ . This is consistent with our results when  
359 comparing the WT and *Frl*<sup>OE</sup> cells (Fig. 7e).

360 Overall, our results indicate that the persistent F-Actin network acts as a support for the robust  
361 transmission of contractile forces. Absence of this network yields sparse connectivity, which  
362 affects homogeneous force transmission to the cell boundaries, and reduces the propagation  
363 range of contractile forces.

## 364 Discussion

---

365 While most studies concerning the pulsed cortical contractility focused on deciphering the  
366 mechanisms underlying the emergence of MyoII pulsatility, we focused here on how the  
367 cortical F-Actin influences this process in embryonic *Drosophila* epithelial cells. We showed  
368 that, in both ectodermal (GBE) and amnioserosa cells (DC), the medio-apical cortex consists  
369 of two differentially regulated, but entangled subpopulations of actin filaments. These two  
370 populations share the same sub-cellular localization but undergo distinct spatio-temporal  
371 dynamics and influence the pulsed cortical contractility in a different way. The pulsatile F-  
372 Actin, together with MyoII, promotes local cell deformations while the persistent homogeneous  
373 network ensures homogeneous connectivity between pulses and the AJs and hence spatial  
374 propagation of deformation. We identified the *Frl*/*Fmnl* formin as a critical nucleator promoting  
375 the persistent network assembly. This constitutes a new role for the *Frl*/*Fmnl* formin since so  
376 far it has been mainly described as participating to the lamellipodia/filopodia formation<sup>41-44</sup>. It  
377 would be interesting to know if, like in other systems, *Frl* is regulated by either *Cdc42*<sup>41,44,45</sup> or

378 Rac1<sup>46</sup> to promote the persistent network assembly. Furthermore, it is likely that other formins  
379 participate to the persistent network assembly, especially in the germband since the lack of Frl  
380 (frl<sup>59/59</sup>) only partially reduces the network density (see Fig. 4b). The DAAM formin would  
381 constitute a first good candidate since it has been shown that DAAM and Frl cooperate during  
382 axon growth in the mushroom bodies of *Drosophila*<sup>45</sup>.

383 Although the pulsatile and persistent actin networks show different dependencies on Rho1  
384 activity, we reported that Frl antagonizes the medio-apical Rho1 dependent contractility.  
385 Further work is required to identify the crosstalk mechanisms operating between Frl and the  
386 pulsed contractility. To this end, it will be interesting to draw from previous studies reporting  
387 that the F-Actin can negatively feedback on Rho1 activation<sup>11,15</sup>. Indeed, it is possible that, like  
388 in the *C.elegans* zygote, some Rho1 inhibitors (e.g. RhoGAPs) bind to cortical F-Actin in our  
389 systems. Consequently, modifying the persistent network density, through Frl loss or gain of  
390 function, could in turn modulate the levels of apical Rho1 activation. It has also been shown  
391 that advection acts as a positive feedback for pulsatility, by increasing the local concentration  
392 of upstream regulators (e.g. Rho1 and Rok)<sup>13</sup>. It will therefore be interesting to study how the  
393 persistent network influence advection and how lowering/increasing the network density affects  
394 this feedback mechanism.

395 Our data also revealed that modulating Frl levels has an impact on epithelial dynamics at the  
396 cellular and tissue scale (see Fig. 6). Although this is probably due in part to the effect of Frl  
397 on the medial actomyosin pulsatility, we designed a series of analysis to understand how the  
398 persistent network may influence the pulsed contractility in mechanical terms. It was suggested  
399 that the medio-apical F-Actin acts as a scaffold to transmit contractile forces to the AJs and, by  
400 extension, to the surrounding tissue<sup>7,47-49</sup>. Our results revealed that the persistent network does  
401 indeed play a key role in this process by promoting the uniform distribution and the propagation  
402 of contractile forces at longer range. We also devised a numerical model recapitulating  
403 qualitatively our experimental measurements and providing solid evidences arguing that Frl  
404 influences epithelial dynamics through the persistent network assembly, independently from its  
405 effect on the actomyosin pulsatility.

406 Overall, this work sheds new light on how the cortical F-Actin layer assembles *in vivo* and how  
407 its dynamic organization influences MyoII-induced stress propagation. Our findings echo to  
408 previous experimental and theoretical studies demonstrating that the F-Actin network, through  
409 its cross-linking state<sup>50-53</sup>, the length of its filaments<sup>22</sup> or its turnover<sup>48</sup> can mediate the

410 amplitude and the length scale at which cortical stresses propagate. We showed here that the F-  
411 Actin cortex is composed of differentially regulated sub-populations of filaments influencing  
412 its mechanical properties, distinctly, namely contraction and spatial propagation of cortex  
413 deformation. Tissue morphogenesis requires interaction between different cellular and tissue  
414 level deformation whose propagation in space and time are little understood. It will be important  
415 to unravel how cells may tune in different stages of development or in different tissues these  
416 properties. Our work suggests that actin network regulation is an important part of this  
417 regulatory process.

## 418 **Acknowledgements**

---

419 We are grateful to József Mihály (Biological Research Centre, HAS, Szeged, Hungary) and  
420 Andreas Jenny (Albert Einstein College of Medicine, The Bronx, NY, USA) for providing fly  
421 stocks. We thank members of the Lecuit and Lenne groups for stimulating discussions and  
422 comments during the course of this project. We also thank FlyBase for maintaining databases  
423 and the Bloomington Drosophila Stock Center for providing fly stocks. The experiments were  
424 performed using the PiCSL-FBI core facility (IBDM, Marseille, France), a member of the  
425 France-BioImaging national research infrastructure supported by the French National Research  
426 Agency (ANR-10-INBS-04-01, “Investissements d’Avenir”). B.D. was supported by the ERC  
427 (grant Biomecamorph #323027) and Fondation Bettencourt Schueller. R.C. and J-M.P. were  
428 supported by the CNRS. TL was supported by the CNRS, followed by the Collège de France.

## 429 **Author contributions**

---

430 B.D. and T.L. conceived the project. B.D. performed experiments/quantifications and  
431 developed analytical methods. R.C. designed the numerical model and performed the  
432 simulations. G.G-G. isolated the *frt*<sup>59/59</sup> null allele. J-M.P. created all the fluorescent constructs.  
433 B.D., R.C. and T.L. discussed the data and wrote the manuscript.

## 434 **Competing interests**

---

435 The authors declare no competing interests.

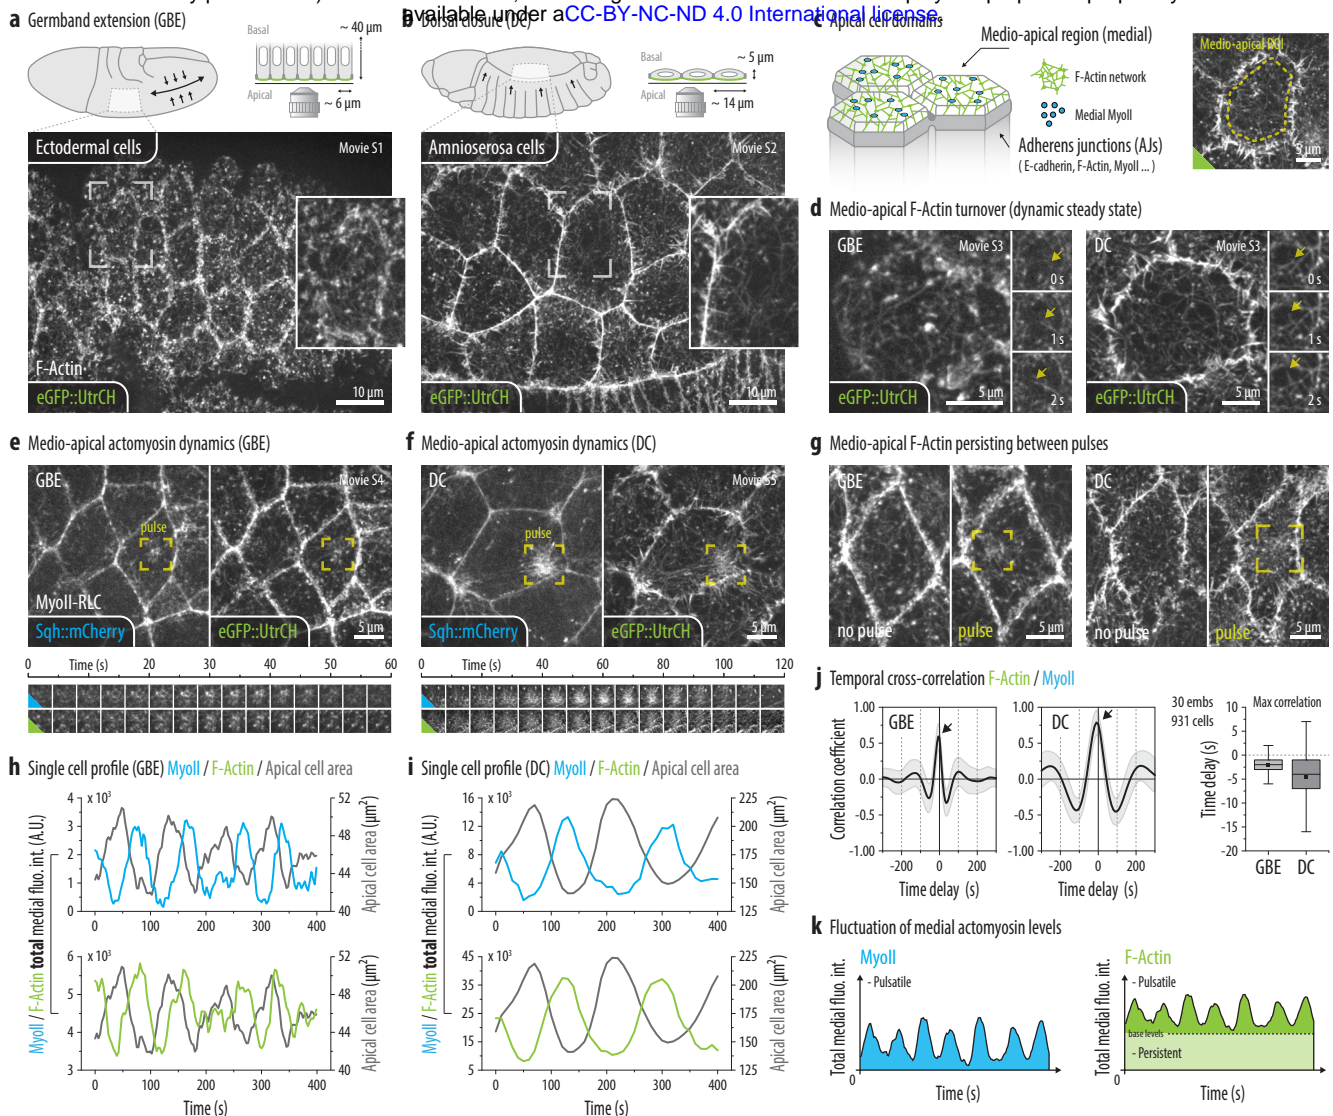



436 **Fig. 1 | Spatio-temporal dynamics of medio-apical F-Actin. (a,b)** Live F-Actin localization  
437 revealed by the eGFP::UtrCH probe in ectodermal cells during germband elongation (GBE) or  
438 amnioserosa cells during dorsal closure (DC). Top panel : schematic of cells localization within  
439 the embryo and cross-section of the corresponding epithelia. Main image : single time-point  
440 extracted from the [Supplementary Movie 1](#) (GBE) or [2](#) (DC), showing a max-proj. ( $4 \times 0.33$   
441  $\mu\text{m}$ ) of the most apical planes. Inserted images : selected zoomed region (see yellow frames,  
442 main images). **(c)** Left panel : diagram of the apical domains of early *Drosophila* epithelial  
443 cells, representing both the medio-apical and the junctional sub-domains. Right panel : typical  
444 region of interest (ROI) used to quantify the medio-apical actomyosin levels. **(d)** High  
445 frequency imaging reveals the constant turnover of medio-apical actin filaments  
446 (eGFP::UtrCH). Main images : single time-point extracted from the [Supplementary Movie 3](#),  
447 left (GBE) or [4](#) (DC), max-proj. ( $2 \times 0.33 \mu\text{m}$ ). Time series (right) : three consecutive time-  
448 points highlighting an actin polymerization event (see white arrows). **(e,f)** Live MyoII-RLC  
449 (Sqh::mCherry) and F-Actin (eGFP::UtrCH) localization in cell(s) undergoing cortical pulsed  
450 contractility (MyoII pulses). Main images : single time-point extracted from the [Supplementary](#)  
451 [Movie 5](#) (GBE) or [6](#) (DC), max-proj. ( $4 \times 0.33 \mu\text{m}$ ). Time series (bottom) : zoomed image  
452 sequence showing the assembly/disassembly of a selected actomyosin pulse (see yellow frames,  
453 main images). **(g)** Medio-apical F-Actin localization in cell undergoing (pulse) or not (no pulse)  
454 a contractile event during GBE (left panel) or DC (right panel). The yellow frames indicate  
455 pulses localization. **(h,i)** Temporal variations of apical cell area and total medial MyoII-RLC  
456 (top) or F-Actin (bottom) fluo. int. in a selected cell during GBE (g) or DC (h). **(j)** Line graphs  
457 : mean  $\pm$  S.D. of averaged temporal cross-correlation analysis between total medial F-Actin  
458 and MyoII-RLC fluo. int. Box plot : time delay for max. correlation of the averaged temporal  
459 cross-correlation (see black arrow). **(k)** Schematic representation of the medial actomyosin  
460 levels fluctuation. Both MyoII and F-Actin are pulsatile but, contrary to MyoII, the F-Actin  
461 oscillates over nonzero baseline of persistent actin filaments. Box plots (i,j) : extend from 1<sup>st</sup>  
462 (Q1) to 3<sup>rd</sup> (Q3) quartile ( $Q3-Q1 = \text{IQR}$ ), whiskers :  $Q1$  or  $Q3 \pm 1.5 \times \text{IQR}$ , horizontal lines :  
463 medians, black squares : means.



**Fig 2. Rho1 pathway inhibition reveals two differentially regulated medio-apical F-Actin sub-populations (GBE)**  
 bioRxiv preprint doi: <https://doi.org/10.1101/2020.05.14.145333>; this version posted May 14, 2020. The copyright holder for this preprint (which was not certified by peer review) is the author/funder, who has granted bioRxiv a license to display the preprint in perpetuity. It is made available under aCC-BY-NC-ND 4.0 International license.

**a** Rho1 signaling pathway

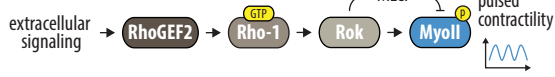

**b** Rho1 pathway inhibition (GBE):  
 C3-transferase (Rho1 inhibitor), RhoGEF2<sup>-/-</sup>

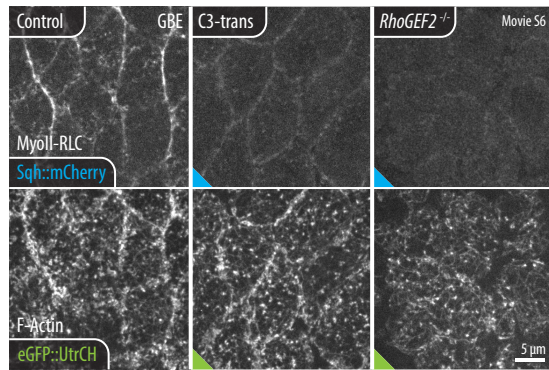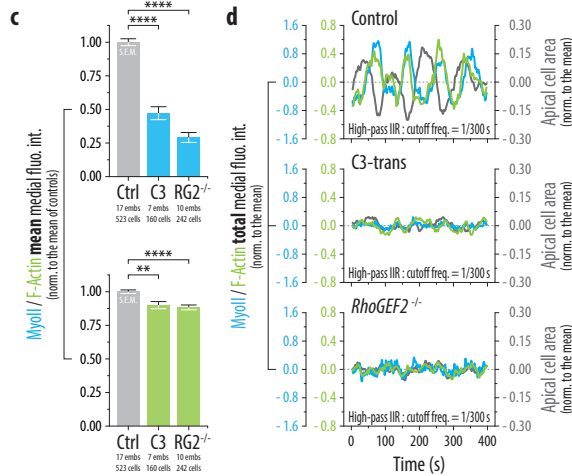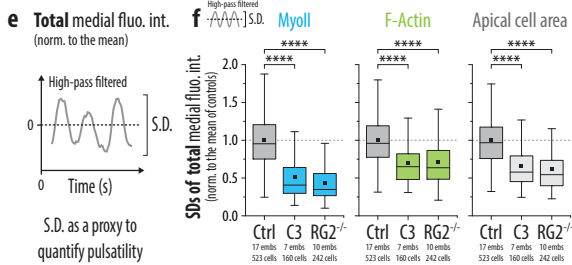

464 **Fig. 2 | Rho1 pathway inhibition reveals two differentially regulated medio-apical F-Actin**  
465 **sub-populations (GBE).** (a) Diagram representing the molecular components of the Rho1  
466 signaling pathway. (b) Live MyoII-RLC (Sqh::mCherry) and F-Actin (eGFP::UtrCH)  
467 localization in ectodermal cells during GBE, in control, C3-transferase injected or *RhoGEF2*<sup>-/-</sup>  
468 mutant embryos. Images represent a single time-point extracted from the [Supplementary Movie](#)  
469 [6](#), max-proj. (4 x 0.33 μm). (c) Bar plots : mean ± S.E.M. medial MyoII (top panel) and F-Actin  
470 (bottom panel) fluo. int. averaged per cell and over time (150 x 3 s). Results are normalized to  
471 the mean of controls : water injected (C3-transferase) or WT (*RhoGEF2*<sup>-/-</sup>). Controls are  
472 grouped together for a concise display. (d) Temporal variations of apical cell area (grey), total  
473 medial MyoII-RLC (blue) and F-Actin (green) fluo. int. in a selected cell. Data are high-pass  
474 filtered (cutoff freq. 1/300 s) and normalized to the mean. (e) Measuring S.D. of high-pass  
475 filtered apical cell area or total medial fluo. int. fluctuations as a proxy to quantify pulsatility.  
476 (f) Box plots : cell averaged S.D. of high-pass filtered total medial MyoII-RLC (left) / F-Actin  
477 (middle) fluo. int. and apical cell area (right). Results are normalized to the mean of controls.  
478 Box plots (f) : extend from 1<sup>st</sup> (Q1) to 3<sup>rd</sup> (Q3) quartile (Q3-Q1 = IQR), whiskers : Q1 or Q3 ±  
479 1.5 x IQR, horizontal lines : medians, black squares : means. Statistical significance (c,f) : two-  
480 sample t-test, NS : p > 5E-2, \* : p < 5E-2, \*\* : p < 5E-3, \*\*\* : p < 5E-4, \*\*\*\* : p < 5E-5.

**Fig 3 Rho1 pathway inhibition reveals two differentially regulated medio-apical F-Actin sub-populations (DC)**  
 not certified by peer review) is the author/funder, who has granted bioRxiv a license to display the preprint in perpetuity. It is made available under aCC-BY-NC-ND 4.0 International license.

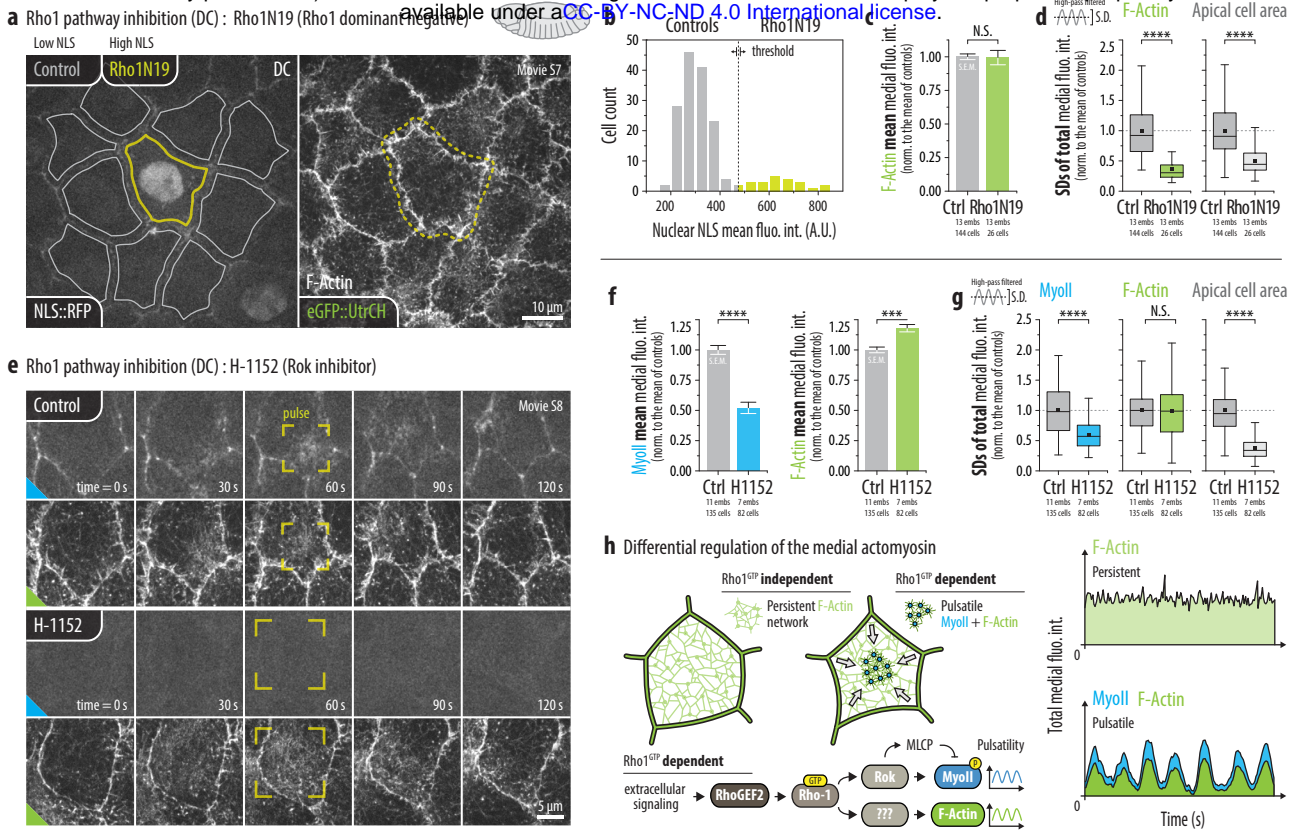

481 **Fig. 3 | Rho1 pathway inhibition reveals two differentially regulated medio-apical F-Actin**  
482 **sub-populations (DC).** (a) Live F-Actin (eGFP::UtrCH) localization in amnioserosa cells  
483 during DC, in WT (grey outline) or Rho1N19 (yellow outline) overexpressing cells. Images  
484 represent a single time-point extracted from the [Supplementary Movie 7](#), max-proj. (4 x 0.33  
485  $\mu\text{m}$ ). (b) Distribution of measured nuclear NLS::RFP fluo. int. and selected threshold to define  
486 the WT (<625) and Rho1N19 overexpressing cells (>625). (c) Bar plots : mean  $\pm$  S.E.M. medial  
487 F-Actin fluo. int. averaged per cell and over time (90 or 120 x 10 sec). Results are normalized  
488 to the mean of WT cells. (d) Box plots : cell averaged S.D. of high-pass filtered (cutoff freq.  
489 1/600 s) total medial F-Actin (left) fluo. int. and apical cell area (right). Results are normalized  
490 to the mean of WT cells. (e) Live MyoII-RLC (Sqh::mKate2) and F-Actin (eGFP::UtrCH)  
491 localization in amnioserosa cells during DC, in control (water injected) and H-1152 injected  
492 embryos. Time series : images are extracted from the [Supplementary Movie 8](#), max-proj. (4 x  
493 0.33  $\mu\text{m}$ ). The yellow frames show the typical spread of a pulse in these two conditions. (f) Bar  
494 plots : mean  $\pm$  S.E.M. medial F-Actin fluo. int. averaged per cell and over time (90 or 120 x 10  
495 s). Results are normalized to the mean of controls. (g) Box plots : cell averaged S.D. of high-  
496 pass filtered (cutoff freq. 1/600 s) total medial MyoII-RLC (left) / F-Actin (middle) fluo. int.  
497 and apical cell area (right). Results are normalized to the mean of controls. (h) Diagrams  
498 representing the differential regulation of medio-apical actomyosin. A Rho1 independent  
499 pathway promotes the persistent F-Actin network assembly (F-Actin baseline) while Rho1  
500 activity underlies both the MyoII and F-Actin pulsatility. Box plots (d,g) : extend from 1<sup>st</sup> (Q1)  
501 to 3<sup>rd</sup> (Q3) quartile (Q3-Q1 = IQR), whiskers : Q1 or Q3  $\pm$  1.5 x IQR, horizontal lines : medians,  
502 black squares : means. Statistical significance (c,d,f,g) : two-sample t-test, NS :  $p > 5E-2$ , \* :  $p$   
503  $< 5E-2$ , \*\* :  $p < 5E-3$ , \*\*\* :  $p < 5E-4$ , \*\*\*\* :  $p < 5E-5$ .

**Fig 4 The Frl formin promotes the persistent F-Actin network assembly** 19. The copyright holder for this preprint (which was not certified by peer review) is the author/funder, who has granted bioRxiv a license to display the preprint in perpetuity. It is made available under aCC-BY-NC-ND 4.0 International license.

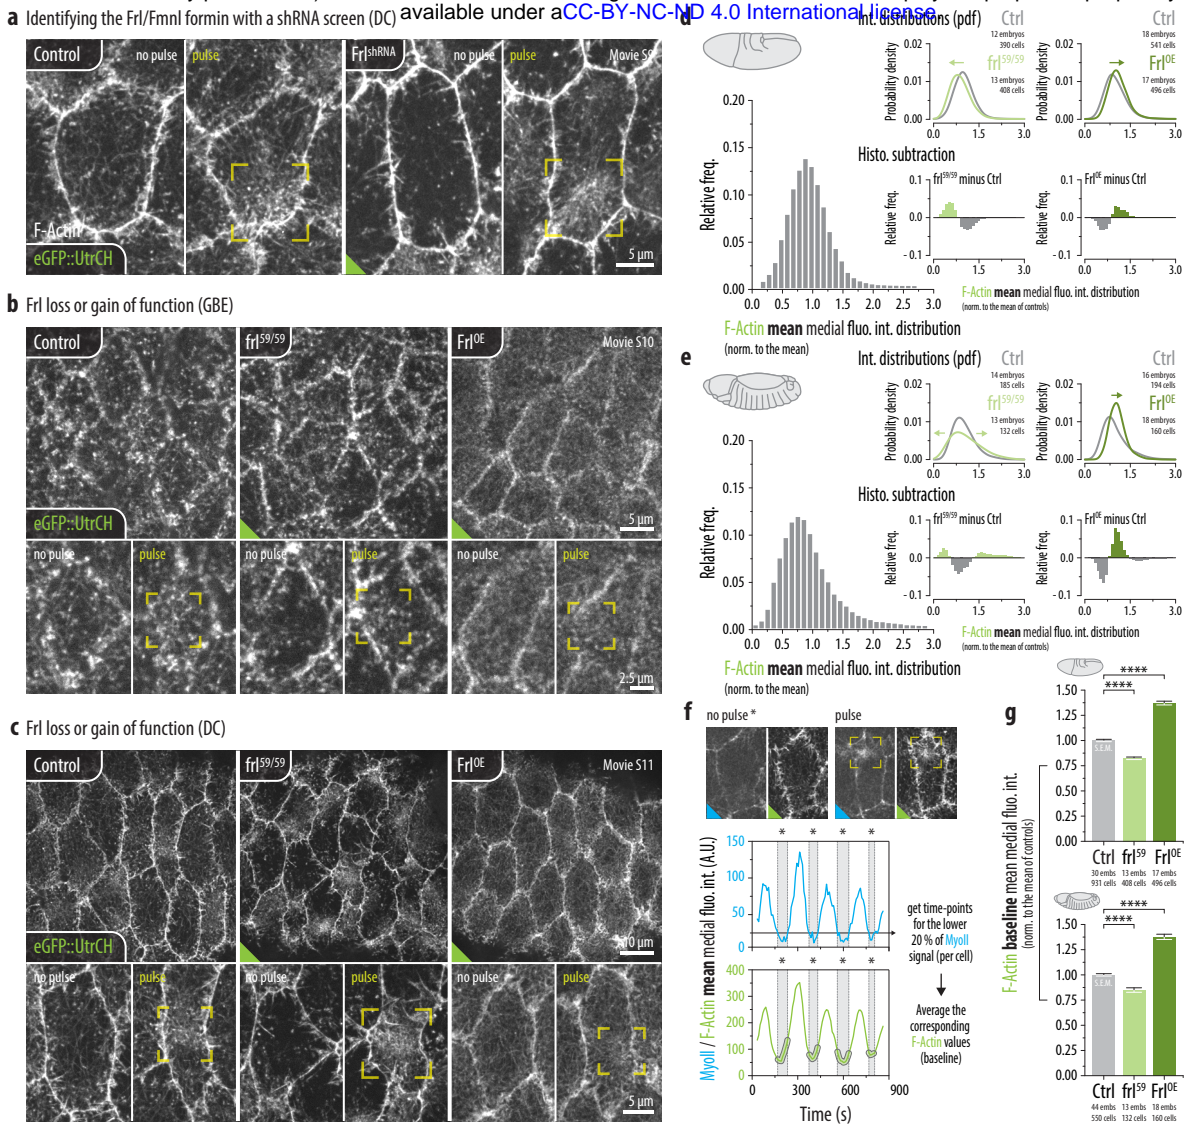



504 **Fig. 4 | The Frl/Fmnl formin promotes the persistent F-Actin network assembly. (a,b,c)**  
505 Live F-Actin (eGFP::UtrCH) localization in ectodermal (GBE) or amnioserosa cells (DC) in  
506 the following conditions : WT, Frl<sup>shRNA</sup> (shRNA against Frl), frl<sup>59/59</sup> (frl null mutant) or Frl<sup>OE</sup>  
507 (Frl overexpression). Images represent either a time-point between two pulses (“no pulse”) or  
508 during a pulse (“pulse”) and are extracted from : (a) [Supplementary Movie 9](#) (DC, WT vs  
509 Frl<sup>shRNA</sup>) ; (b) [Supplementary Movie 10](#) (GBE, WT vs frl<sup>59/59</sup> vs Frl<sup>OE</sup>) ; (c) [Supplementary](#)  
510 [Movie 11](#) (DC, WT vs frl<sup>59/59</sup> vs Frl<sup>OE</sup>). The yellow frames show the pulse localization. **(d,e)**  
511 Mean medial F-Actin fluo. int. distributions in Frl loss or gain of function during GBE (d) or  
512 DC (e). Main bar plots : distributions for WT embryos. Probability density functions (pdf) and  
513 histograms subtraction : distributions comparison and relative bins enrichment between WT  
514 and frl<sup>59/59</sup> (left) or WT and Frl<sup>OE</sup> (right). All distributions are normalized to the mean of  
515 controls. **(f)** Measuring the persistent network density (F-Actin baseline) by averaging the mean  
516 medial F-Actin fluo. int. during the 20% lowest mean medial MyoII fluo. int. time-points. **(g)**  
517 Bar plots : mean ± S.E.M. medial F-Actin baseline averaged per cell during GBE (top panel)  
518 or DC (bottom panel). Results are normalized to the mean of WT cells. Statistical significance  
519 (g) : two-sample t-test, NS :  $p > 5E-2$ , \* :  $p < 5E-2$ , \*\* :  $p < 5E-3$ , \*\*\* :  $p < 5E-4$ , \*\*\*\* :  $p < 5E-$   
520 5.



**a** Frl loss or gain of function (GBE)

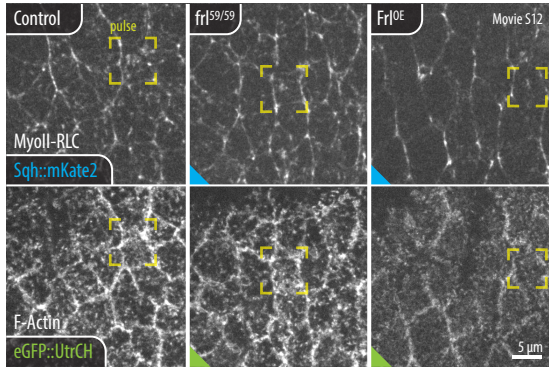

**b** Frl loss or gain of function (DC)

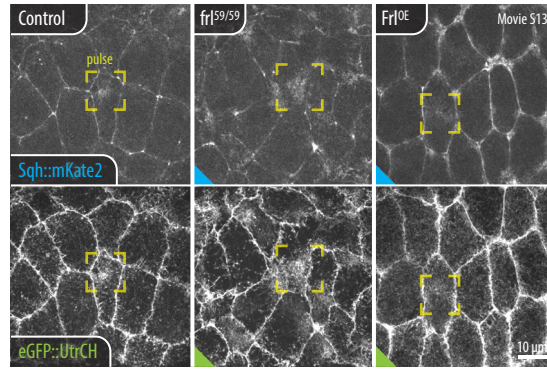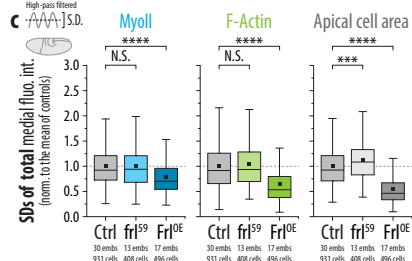

**e** Frl gain of function (DC)

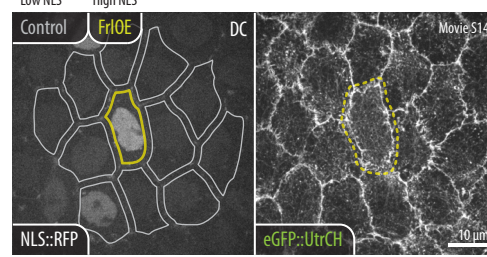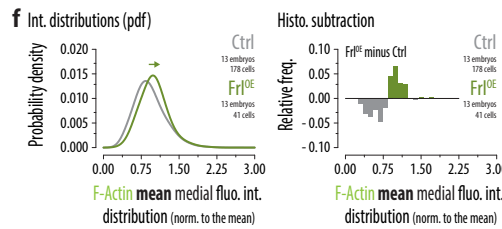

**g** High-pass filtered  $\Delta I.S.D.$

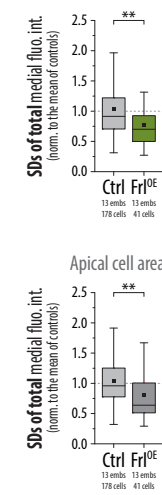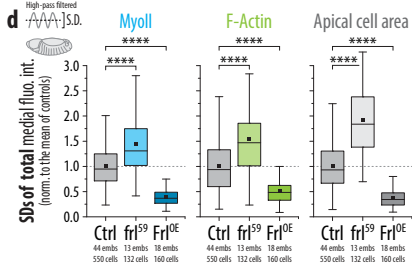

**h** Monitoring Rho1GTP in Frl loss or gain of function (DC)

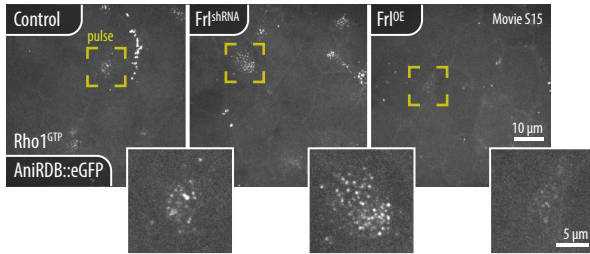

**k** Effect of Frl levels modulation on medial F-Actin dynamics

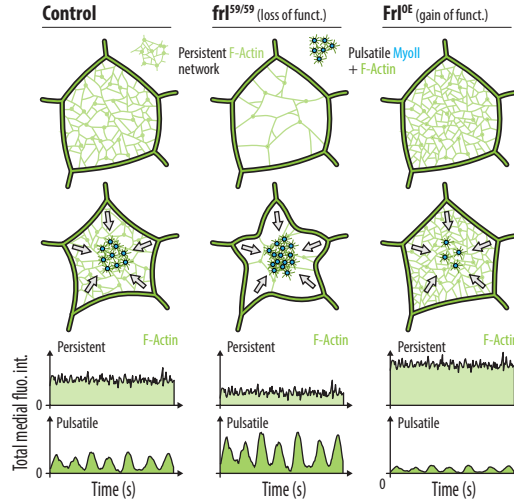

**i** Automatic pulse tracking

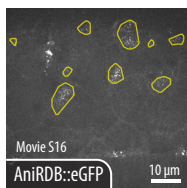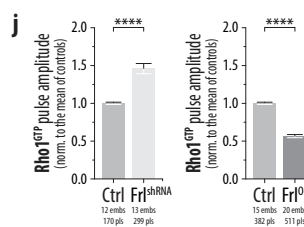

521 **Fig. 5 | Frl antagonizes the Rho1-induced medial pulsed contractility. (a,b)** Live MyoII-  
522 RLC (Sqh::mKate2) and F-Actin (eGFP::UtrCH) localization in ectodermal (GBE) or  
523 amnioserosa cells (DC), in WT, *frl*<sup>59/59</sup> or *Frl*<sup>OE</sup> embryos. Images represent a single time-point  
524 extracted from the [Supplementary Movie 12](#) (GBE) or [13](#) (DC), max-proj. (4 x 0.33 μm). The  
525 yellow frames show the pulse localization. **(c,d)** Box plots : cell averaged S.D. of high-pass  
526 filtered (cutoff freq. 1/300 s for GBE and 1/600 s for DC) total medial MyoII-RLC (left) / F-  
527 Actin (middle) fluo. int. and apical cell area (right). Results are normalized to the mean of  
528 controls. **(e)** Live F-Actin (eGFP::UtrCH) localization in amnioserosa cells during DC, in WT  
529 (grey outline) or *Frl* (yellow outline) overexpressing cells. Images represent a single time-point  
530 extracted from the [Supplementary Movie 14](#), max-proj. (4 x 0.33 μm). **(f)** Mean medial F-Actin  
531 fluo. int. distributions in WT or *Frl* overexpressing amnioserosa cells during DC. Probability  
532 density functions (pdf) and histograms subtraction : distributions comparison and relative bins  
533 enrichment between WT and *Frl*<sup>OE</sup>. All distributions are normalized to the mean of controls.  
534 **(g)** Box plots : cell averaged S.D. of high-pass filtered (cutoff freq. 1/600 s) total medial F-  
535 Actin (top) fluo. int. and apical cell area (bottom). Results are normalized to the mean of  
536 controls. **(h)** Live Rho1GTP (AniRBD::eGFP) localization in amnioserosa cells during DC, in  
537 WT, *Frl*<sup>shRNA</sup> or *Frl*<sup>OE</sup> embryos. Main images : single time-point extracted from the  
538 [Supplementary Movie 15](#), max-proj. (4 x 0.33 μm). Inserted images : selected zoomed on a  
539 pulse (see yellow frames, main images). **(i)** Automatic segmentation and tracking of Rho1GTP  
540 pulses (see Methods and [Supplementary Movie 16](#)). **(j)** Bar plots : mean ± S.E.M. Rho1GTP  
541 pulse amplitude calculated on the total int. of segmented ROIs. Results are normalized to the  
542 mean of WT embryos. **(k)** Diagrams representing how modulating the *Frl* levels influence the  
543 pulsed contractility. In *Frl* loss of function (*frl*<sup>59/59</sup>, *Frl*<sup>shRNA</sup>) the persistent network density is  
544 reduced while the MyoII/F-Actin pulsatility and apical cell contractility are increased.  
545 Overexpressing *Frl* (*Frl*<sup>OE</sup>) induces opposite effects. Box plots (c,d,g) : extend from 1<sup>st</sup> (Q1) to  
546 3<sup>rd</sup> (Q3) quartile (Q3-Q1 = IQR), whiskers : Q1 or Q3 ± 1.5 x IQR, horizontal lines : medians,  
547 black squares : means. Statistical significance (c,d,g,j) : two-sample t-test, NS : p > 5E-2, \* : p  
548 < 5E-2, \*\* : p < 5E-3, \*\*\* : p < 5E-4, \*\*\*\* : p < 5E-5.

**a** Epithelial dynamics in Frl loss or gain of function

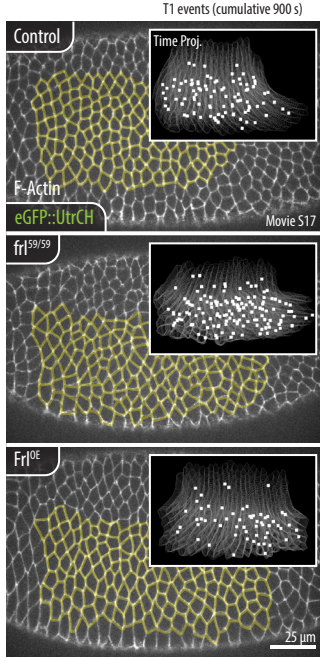

**b** T1 Events

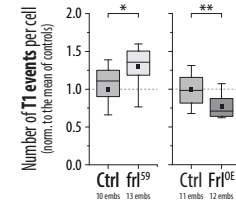

**c** Apical cell area fluct.

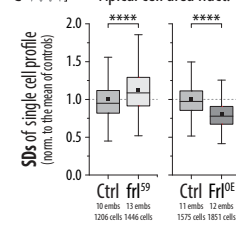

**d** Apical cell area fluct.

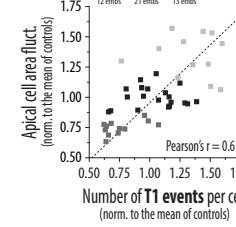

**e** Germband extension in Frl loss or gain of function

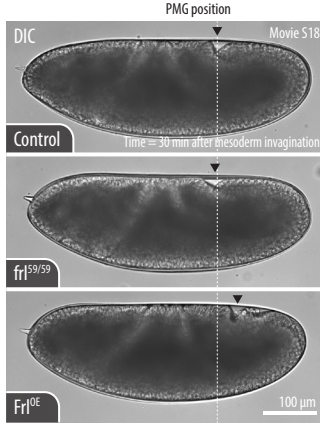

**f** PMG position

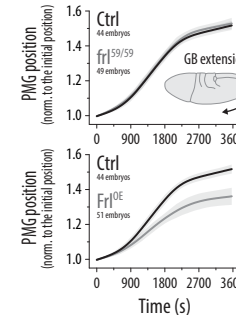

**g** Apical cell surface deformations (DC)

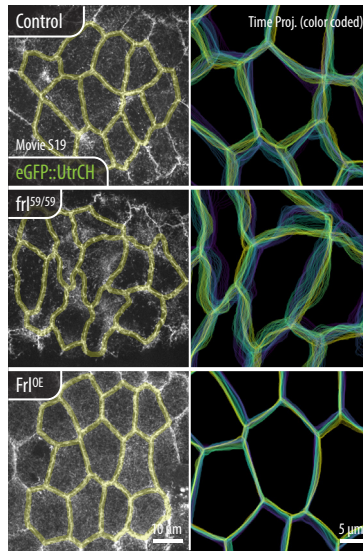

**j** Dorsal closure in Frl loss of function

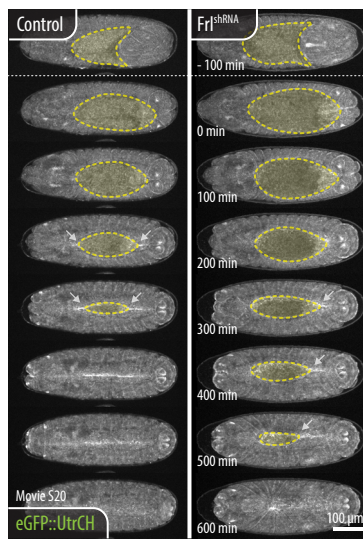

**h**

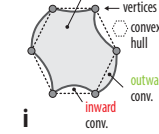

**i**

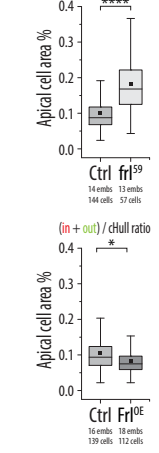

**k**

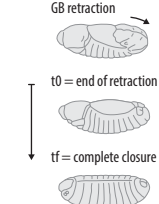

**l**

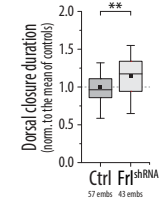

549 **Fig. 6 | Cellular and tissue scale effects of Frl loss or gain of function. (a)** Live F-Actin  
550 (eGFP::UtrCH) in ectodermal cells revealing epithelial dynamics during GBE in WT,  $frl^{59/59}$  or  
551  $Frl^{OE}$  embryos. Main images : single time-point extracted from the [Supplementary Movie 17](#).  
552 The yellow cell outlines show the result of the automatic cell segmentation procedure. Inserted  
553 images : time-projection (900 s) of the cell outlines (grey) and the recorded T1 events (white  
554 squares). **(b)** Box plots : number of T1 events per cell for the duration of the movies (900 s).  
555 Results are normalized to the mean of WT embryos. **(c)** Box plots : cell averaged S.D. of high-  
556 pass filtered (cutoff freq. 1/600 s) apical cell area. Results are normalized to the mean of WT.  
557 **(d)** Scatter plots : apical cell area fluctuations as a function of the number of T1 events per cell  
558 in WT,  $frl^{59/59}$  or  $Frl^{OE}$  condition. The dashed line shows a linear fit with a Pearson's correlation  
559 coefficient  $r = 0.61$ . **(e)** Live DIC movies of embryos undergoing GBE in WT,  $frl^{59/59}$  or  $Frl^{OE}$   
560 condition. Images represent a single time-point 30 min after the onset of gastrulation and are  
561 extracted from the [Supplementary Movie 18](#). The black arrowheads show the posterior mid-gut  
562 (PMG) position. **(f)** Line plots : PMG position  $\pm$  S.D. over time revealing the progression of the  
563 germband extension. Data are normalized to the initial PMG position. **(g)** Live F-Actin  
564 (eGFP::UtrCH) in amnioserosa cells during DC in WT,  $frl^{59/59}$  or  $Frl^{OE}$  embryos. Left images :  
565 single time-point extracted from the [Supplementary Movie 19](#), max-proj. ( $4 \times 0.33 \mu\text{m}$ ). The  
566 yellow cell outlines show the result of the automatic cell segmentation procedure. Right images  
567 : color coded time-projection (900 s) of the cell outlines. **(h)** Measuring cell shape irregularity  
568 by comparing the convex hull (connecting vertices) and the segmented apical cell surface. **(i)**  
569 Box plots : ratio between the surface of the inward + outward regions and the surface occupied  
570 by the convex hull. **(j)** Live F-Actin (eGFP::UtrCH) low magnification imaging of embryos  
571 undergoing DC in WT or  $Frl^{shRNA}$  condition. Time series : images are extracted from the  
572 [Supplementary Movie 20](#) at the indicated time-points. The yellow dashed lines and the  
573 surrounded regions shows the amnioserosa cells at the surface of the embryo. **(k)** Schematic  
574 representation of the DC process. **(l)** Box plots : DC duration normalized to the mean of WT  
575 embryos. Box plots (b,c,i,l) : extend from 1<sup>st</sup> (Q1) to 3<sup>rd</sup> (Q3) quartile ( $Q3-Q1 = IQR$ ), whiskers  
576 :  $Q1$  or  $Q3 \pm 1.5 \times IQR$ , horizontal lines : medians, black squares : means. Statistical  
577 significance (b,c,i,l) : two-sample t-test, NS :  $p > 5E-2$ , \* :  $p < 5E-2$ , \*\* :  $p < 5E-3$ , \*\*\* :  $p <$   
578  $5E-4$ , \*\*\*\* :  $p < 5E-5$ .



**Fig 7 | The persistent network promotes the propagation of MyoII induced contractile forces** for this preprint (which was not certified by peer review) is the author/funder, who has granted bioRxiv a license to display the preprint in perpetuity. It is made available under aCC-BY-NC-ND 4.0 International license.

**a** Contractile event dynamics, control vs Frl loss of function

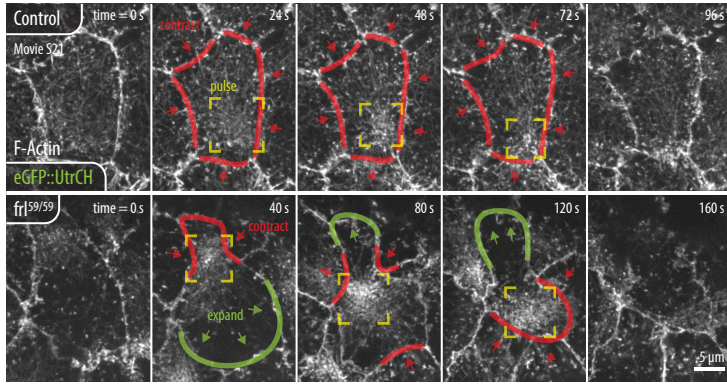

**b** Pulsatile F-Actin emits radial filaments

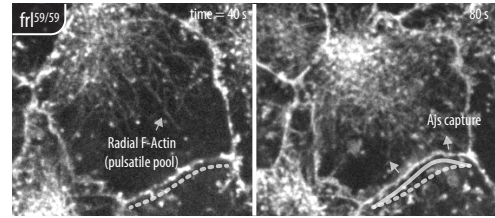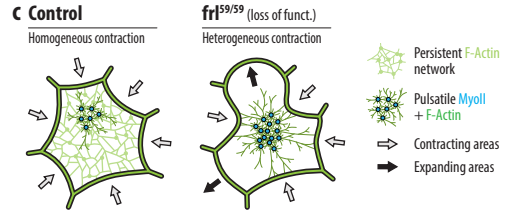

**d** Measuring the medial F-Actin dynamics using KLT tracking

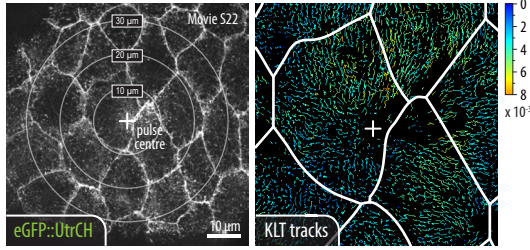

**f** Numerical model:

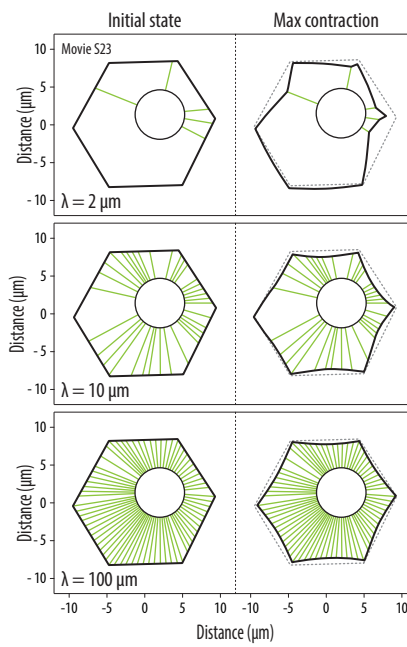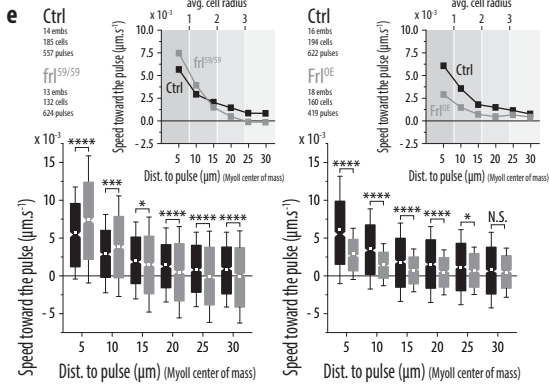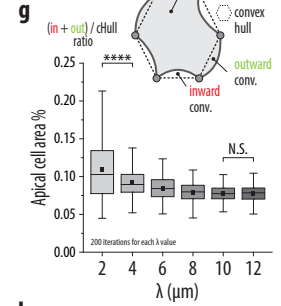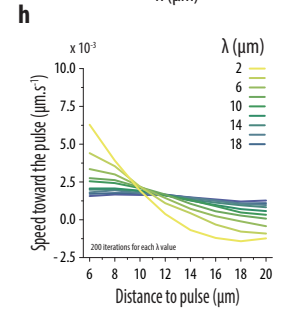

579 **Fig. 7 | The persistent network promotes the propagation of MyoII-induced contractile**  
580 **forces. (a)** Live F-Actin (eGFP::UtrCH) localization in amnioserosa cells during DC comparing  
581 the dynamic of a pulsatile event in a WT and a  $frl^{59/59}$  cell. Time series : images are extracted  
582 from the [Supplementary Movie 21](#) at the indicated time-points, max-proj. (4 x 0.33  $\mu\text{m}$ ). The  
583 yellow frames show the pulse localization, the red and green outlines/arrows show,  
584 respectively, the contracting and the expanding parts of the cell. **(b)** Zoomed view on a  
585 contracting  $frl^{59/59}$  cell displaying radial F-Actin filaments emanating from the pulse core and  
586 capturing the AJs. **(c)** Schematic representation of a contracting cell in WT or  $frl^{59/59}$  condition.  
587 **(d)** Measuring the propagation of pulsatile contractility by following discrete apical F-Actin  
588 structures using a KLT tracking procedure. Left image : concentric circles showing the distance  
589 from a pulse (yellow cross). Right image : single time-point extracted from the [Supplementary](#)  
590 [Movie 22](#), displaying the color-coded speed of KLT tracked structures toward the pulse centre.  
591 The white lines show the segmented cell boundaries. **(e)** Box plots : averaged speed toward the  
592 pulse centre of KLT tracked structures as a function to the distance to the pulse in WT vs  $frl^{59/59}$   
593 (left) or WT vs  $Frl^{OE}$  (right) amnioserosa cells. Data are binned as indicated (distance  $\pm$  2.5  $\mu\text{m}$ ,  
594 e.g. the 5  $\mu\text{m}$  bin contains all tracks within a 2.5 to 7.5  $\mu\text{m}$  distance to the pulse). Line plots :  
595 speed toward the pulse as a function to the distance to the pulse averaged per bin. Each shade  
596 of grey in the background represents the typical size of an amnioserosa cell radius ( $\sim$ 8  $\mu\text{m}$ ). **(f)**  
597 Representative simulations for different values of  $\lambda$  ([Supplementary Movie 23](#)). Left panels  
598 depict the initial condition, right panels depict the cell state upon maximal contraction. Green  
599 segments indicate that a boundary element is connected to the pulse. The pulse position is the  
600 same in the three examples. **(g)** Diagram : Measuring cell shape irregularity by comparing the  
601 convex hull (connecting vertices) and the segmented apical cell surface. Box plots : ratio  
602 between the surface of the inward + outward regions and the surface occupied by the convex  
603 hull (see [Fig. 6k-l](#)) upon maximal deformation. 200 iterations were performed for each value  
604 of  $\lambda$ . For each iteration, the pulse position is chosen randomly within the cell. **(h)** Line plots :  
605 Averaged speed towards the pulse vs. distance to the pulse during the contraction phase.  
606 Averages were performed from 200 iterations for each value of  $\lambda$ . For each iteration, the pulse  
607 position is chosen randomly within the cell. Box plots (e,g) : extend from 1<sup>st</sup> (Q1) to 3<sup>rd</sup> (Q3)  
608 quartile (Q3-Q1 = IQR), whiskers : S.D. (e) or : Q1 or Q3  $\pm$  1.5 x IQR, horizontal lines :  
609 medians, black squares : means. Statistical significance (e,g) : two-sample t-test, NS :  $p > 5E-$   
610 2, \* :  $p < 5E-2$ , \*\* :  $p < 5E-3$ , \*\*\* :  $p < 5E-4$ , \*\*\*\* :  $p < 5E-5$ .



**a** Monitoring F-Actin *in vivo* using eGFP::UtrCH

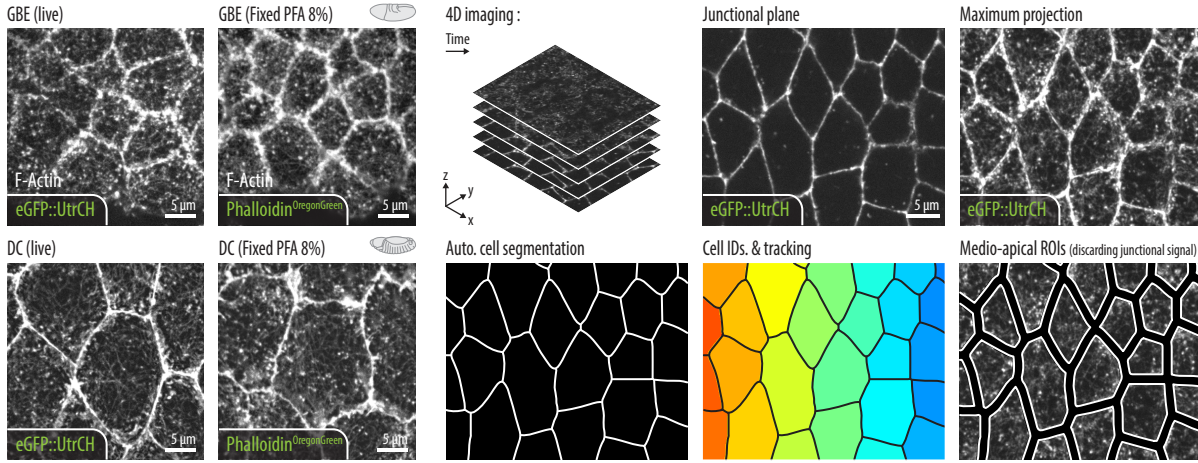

**c** Estimate & subtract background

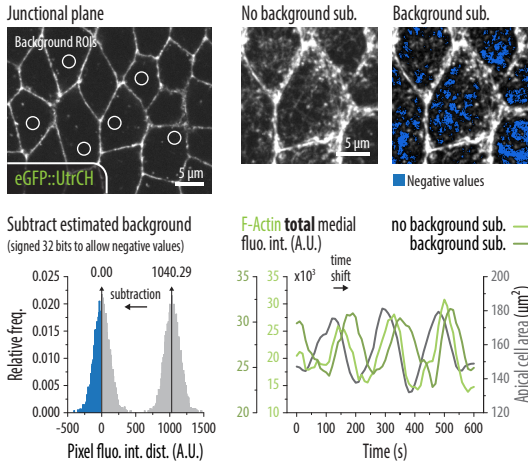

**d** Measuring the level of pulsed contractility

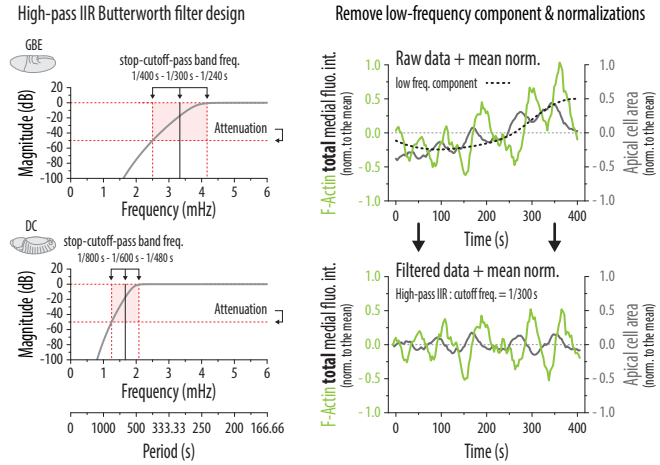

611 **Supplementary Fig. 1** |. **(a)** Comparison between live (eGFP::UtrCH) and fixed (Phalloidin)  
612 F-Actin localization in ectodermal (GBE) and amnioserosa cells (DC). Images represent a max-  
613 proj. of  $4 \times 0.33 \mu\text{m}$ . **(b)** Presentation of the automatic cell segmentation procedure used to  
614 define medio-apical ROIs for quantification (see [Methods](#) for more details). Briefly, cell  
615 boundaries are detected on the lower junctional plane using a watershed algorithm. The  
616 segmented cells are then identified and tracked over time to define ROIs. Finally, these ROIs  
617 are shrunk of a few pixels to discard the junctional signal and the medial fluorescence intensities  
618 are measured on the max. proj. of the Z-series. **(c)** Presentation of the background subtraction  
619 procedure (see [Methods](#) for more details). The background is evaluated on the lower Z-planes  
620 and subtracted from the max. proj. of the Z-series before quantification. Removing the  
621 background is critical to properly measure the total amount of fluorescence in the ever-changing  
622 apical cell surface (see time shift when comparing the medial F-Actin levels with or without  
623 background subtraction). **(d)** To quantify the levels of pulsed contractility, we processed single  
624 cell profiles using a high-pass Butterworth IIR filter (see [Methods](#) for more details). This filter  
625 is used to remove low frequency components and have been adjusted to fit the temporality of  
626 pulsatility in GBE (cutoff freq.  $1/300$  s) and DC (cutoff freq.  $1/600$  s).

**a** Quantifying the pulsatile Rho1 activity

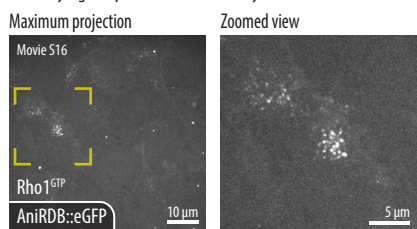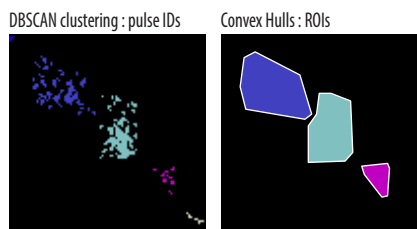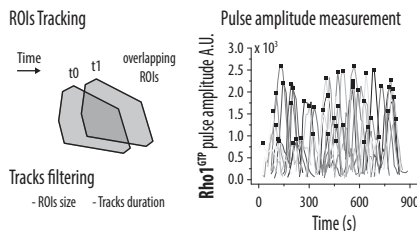

**b** Auto-pulse detection (time)

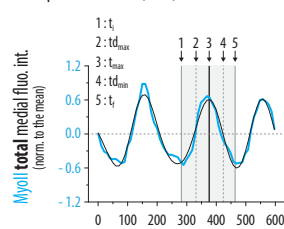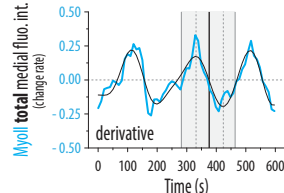

**c** Auto-pulse detection (space)

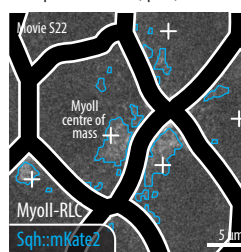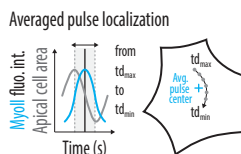

**d** Contraction speed acc. to time and distance

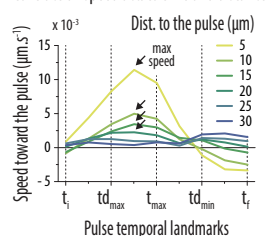

**e** Numerical modeling

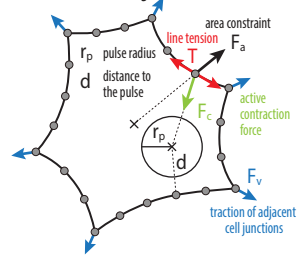

627 **Supplementary Fig. 2** |. **(a)** Description of the method used to quantify pulsatile Rho1  
628 activity without cell segmentation (see [Methods](#) for more details and [Supplementary Movie](#)  
629 [16](#)). Basically, isolated clusters of AniRBD::eGFP signal are detected using a DBSCAN  
630 algorithm. These clusters are then converted into surface ROIs using convex hulls and  
631 overlapping ROIs tracked over time to follow individual pulses. Filters such as min./max. area  
632 or min./max. duration are applied to reduce tracking mistakes. Finally, the AniRBD::eGFP  
633 pulse amplitude measurements are performed considering the maximum of total fluorescence  
634 intensity for each track. **(b)** MyoII pulses are automatically detected in time following the  
635 derivatives of high-pass filtered total medial MyoII levels (see [Methods](#) for more details). Pulse  
636 temporal landmarks have been defined as follow :  $t_i$  : initial time ;  $td_{max}$  : max derivative ;  $t_{max}$   
637 : max amplitude ;  $td_{min}$  : min derivative ;  $t_f$  : final time. **(c)** MyoII pulses are automatically  
638 detected in space by monitoring the centre of mass of the medial sqh::mKate2 signal over time  
639 (see [Methods](#) for more details and [Supplementary Movie 22](#)). The actual pulse centre used for  
640 the KLT analysis is then defined by averaging the position of the recorded centre of mass  
641 between  $td_{max}$  and  $td_{min}$  of the pulse. This time interval corresponds to the period during which  
642 the apical surface contract during a pulse. **(d)** Line plots : Averaged speed towards the pulse  
643 according to pulse temporal landmarks (see above) for different distance bins (see legend). The  
644 black arrows show the time of maximum speed. **(e)** Schematics of the numerical model. The  
645 black circle depicts the actomyosin pulse, and arrows depict forces applied to boundary  
646 elements. Only a fraction of boundary elements is represented.

## 647 **Movie legends**

---

648 **Supplementary Mov. 1 | F-Actin dynamics in ectodermal cells (GBE).** Live 100x imaging  
649 of F-Actin (eGFP::UtrCH) in ectodermal cells during germband extension (GBE). The movie  
650 represents a max. proj. of the 4 most apical z-planes, spaced by 0.33  $\mu\text{m}$  and acquired every 3  
651 seconds.

652 **Supplementary Mov. 2 | F-Actin dynamics in amnioserosa cells (DC).** Live 100x imaging  
653 of F-Actin (eGFP::UtrCH) in amnioserosa cells during dorsal closure (DC). The movie  
654 represents a max. proj. of the 4 most apical z-planes, spaced by 0.33  $\mu\text{m}$  and acquired every 3  
655 seconds.

656 **Supplementary Mov. 3 | Medial F-Actin turnover (GBE+DC).** High temporal resolution live  
657 100x imaging of F-Actin (eGFP::UtrCH) in ectodermal cells during germband extension (GBE,  
658 left panel) and in amnioserosa cells during dorsal closure (DC, right panel). The movie  
659 represents a max. proj. of the 2 most apical z-planes, spaced by 0.33  $\mu\text{m}$  and acquired every 1  
660 second.

661 **Supplementary Mov. 4 | Medial MyoII and F-Actin dynamics (GBE).** Live 100x imaging  
662 of MyoII (Sqh::mCherry, left panel) and F-Actin (eGFP::UtrCH, right panel) in ectodermal  
663 cells during germband extension (GBE). The movie represents a max. proj. of the 4 most apical  
664 z-planes, spaced by 0.33  $\mu\text{m}$  and acquired every 3 seconds.

665 **Supplementary Mov. 5 | Medial MyoII and F-Actin dynamics (DC).** Live 100x imaging of  
666 MyoII (Sqh::mCherry, left panel) and F-Actin (eGFP::UtrCH, right panel) in amnioserosa cells  
667 during dorsal closure (DC). The movie represents a max. proj. of the 4 most apical z-planes,  
668 spaced by 0.33  $\mu\text{m}$  and acquired every 3 seconds.

669 **Supplementary Mov. 6 | Rho1 pathway inhibition (GBE).** Live 100x imaging of MyoII  
670 (Sqh::mCherry, top panels) and F-Actin (eGFP::UtrCH, bottom panels) in ectodermal cells  
671 during germband extension (GBE). Left panels : control embryo (water injected), middle panels  
672 : C3-transferase (Rho1 inhibitor) injected embryo, right panels : *RhoGEF2*<sup>-/-</sup> embryo. The  
673 movies represent a max. proj. of the 4 most apical z-planes, spaced by 0.33  $\mu\text{m}$  and acquired  
674 every 3 seconds.

675 **Supplementary Mov. 7 | Rho1 pathway inhibition (DC).** Live 100x imaging of F-Actin  
676 (eGFP::UtrCH) in amnioserosa cells during dorsal closure (DC). White outlines : control cells,  
677 yellow outline : Rho1N19 (Rho1 dominant negative form) expressing cell. The movie  
678 represents a max. proj. of the 4 most apical z-planes, spaced by 0.33  $\mu\text{m}$  and acquired every 10  
679 seconds.

680 **Supplementary Mov. 8 | Rok kinase inhibition (DC).** Live 100x imaging of MyoII  
681 (Sqh::mCherry, top panel) and F-Actin (eGFP::UtrCH, bottom panel) in amnioserosa cells  
682 during dorsal closure (DC). Left panels : control embryo (water injected), right panels : H-1152  
683 (Rok inhibitor) injected embryo. The movies represent a max. proj. of the 4 most apical z-  
684 planes, spaced by 0.33  $\mu\text{m}$  and acquired every 10 seconds.

685 **Supplementary Mov. 9 | Frl loss of function (DC).** Live 100x imaging of F-Actin  
686 (eGFP::UtrCH) in amnioserosa cells during dorsal closure (DC). Left panel : control embryo,  
687 right panel : Frl shRNA expressing embryo. The movie represents a max. proj. of the 4 most  
688 apical z-planes, spaced by 0.33  $\mu\text{m}$  and acquired every 10 seconds.

689 **Supplementary Mov. 10 | Frl loss or gain of function (GBE).** Live 100x imaging of F-Actin  
690 (eGFP::UtrCH) in ectodermal cells during germband extension (GBE). Left panel : control  
691 embryo, middle panel :  $\text{frl}^{59/59}$  (null mutant) embryo, right panel :  $\text{Frl}^{\text{OE}}$  (overexpression)  
692 embryo. The movie represents a max. proj. of the 2 most apical z-planes, spaced by 0.33  $\mu\text{m}$   
693 and acquired every 2 seconds.

694 **Supplementary Mov. 11 | Frl loss or gain of function (DC).** Live 100x imaging of F-Actin  
695 (eGFP::UtrCH) in amnioserosa cells during dorsal closure (DC). Left panel : control embryo,  
696 middle panel :  $\text{frl}^{59/59}$  (null mutant) embryo, right panel :  $\text{Frl}^{\text{OE}}$  (overexpression) embryo. The  
697 movie represents a max. proj. of the 2 most apical z-planes, spaced by 0.33  $\mu\text{m}$  and acquired  
698 every 2 seconds.

699 **Supplementary Mov. 12 | MyoII and F-Actin dynamics in Frl loss or gain of function**  
700 **(GBE).** Live 100x imaging of MyoII (Sqh::mKate2, top panel) and F-Actin (eGFP::UtrCH,  
701 bottom panel) in ectodermal cells during germband extension (GBE). Left panel : control  
702 embryo, middle panel :  $\text{frl}^{59/59}$  (null mutant) embryo, right panel :  $\text{Frl}^{\text{OE}}$  (overexpression)  
703 embryo. The movie represents a max. proj. of the 4 most apical z-planes, spaced by 0.33  $\mu\text{m}$   
704 and acquired every 6 seconds.



705 **Supplementary Mov. 13 | MyoII and F-Actin dynamics in Frl loss or gain of function (DC).**

706 Live 100x imaging of MyoII (Sqh::mKate2, top panel) and F-Actin (eGFP::UtrCH, bottom  
707 panel) in amnioserosa cells during dorsal closure (DC). Left panel : control embryo, middle  
708 panel :  $frl^{59/59}$  (null mutant) embryo, right panel :  $Frl^{OE}$  (overexpression) embryo. The movie  
709 represents a max. proj. of the 4 most apical z-planes, spaced by 0.33  $\mu\text{m}$  and acquired every 10  
710 seconds.

711 **Supplementary Mov. 14 | Frl gain of function (DC).**

712 Live 100x imaging of F-Actin (eGFP::UtrCH) in amnioserosa cells during dorsal closure (DC). White outlines : control cells,  
713 yellow outline :  $Frl^{OE}$  (overexpression) cell. The movie represents a max. proj. of the 4 most  
714 apical z-planes, spaced by 0.33  $\mu\text{m}$  and acquired every 10 seconds.

715 **Supplementary Mov. 15 | Rho1GTP dynamics in Frl loss or gain of function (DC).**

716 Live 100x imaging of Rho1GTP (AniRBD::eGFP) in amnioserosa cells during dorsal closure (DC).  
717 Left panel : control embryo, middle panel : Frl shRNA expressing embryo, right panel :  $Frl^{OE}$   
718 (overexpression) embryo. The movie represents a max. proj. of the 4 most apical z-planes,  
719 spaced by 0.33  $\mu\text{m}$  and acquired every 10 seconds.

720 **Supplementary Mov. 16 | Automatic Rho1GTP pulse tracking (DC).**

721 Live 100x imaging of Rho1GTP (AniRBD::eGFP) in amnioserosa cells during dorsal closure (DC), showing the  
722 method used to automatically track Rho1GTP pulses without cell segmentation. Left panel :  
723 tracked ROIs, right panel : individual pulses detected using DBScan clustering. The movie  
724 represents a max. proj. of the 4 most apical z-planes, spaced by 0.33  $\mu\text{m}$  and acquired every 10  
725 seconds.

726 **Supplementary Mov. 17 | Epithelial dynamics in Frl loss or gain of function (GBE).**

727 Live 40x imaging of F-Actin (eGFP::UtrCH) in ectodermal cells during germband extension (GBE).  
728 Left panel : control embryo, middle panel :  $frl^{59/59}$  (null mutant) embryo, right panel :  $Frl^{OE}$   
729 (overexpression) embryo. The yellow cell outlines represent the results of cell segmentation  
730 and the white squares mark the localization of T1 events. The movie represents one z-plane,  
731 acquired every 20 seconds.

732 **Supplementary Mov. 18 | Germband extension in Frl loss or gain of function (GBE).**

733 DIC live imaging of embryos undergoing germband extension (GBE). Top panel : control embryo,  
734 middle panel :  $frl^{59/59}$  (null mutant) embryo, bottom panel :  $Frl^{OE}$  (overexpression) embryo. The  
735 movie represents one z-plane, acquired every 30 seconds.

736 **Supplementary Mov. 19 | Apical cell surface deformations in Frl loss or gain of function**  
737 **(DC).** Live 100x imaging of F-Actin (eGFP::UtrCH) in amnioserosa cells during dorsal closure  
738 (DC). Left panel : control embryo, middle panel :  $frl^{59/59}$  (null mutant) embryo, right panel :  
739  $Frl^{OE}$  (overexpression) embryo. The inserted images represent the results of cell segmentation.  
740 The movie represents a max. proj. of the 4 most apical z-planes, spaced by  $0.33\ \mu\text{m}$  and acquired  
741 every 10 seconds.

742 **Supplementary Mov. 20 | Dorsal closure in Frl loss or gain of function (DC).** Live 10x  
743 imaging of F-Actin (eGFP::UtrCH) of embryos undergoing dorsal closure (DC). Top panel :  
744 control embryo, bottom panel : Frl shRNA expressing embryo. The movie represents a max.  
745 proj. of the 10 z-planes, spaced by  $5\ \mu\text{m}$  and acquired every 10 minutes.

746 **Supplementary Mov. 21 | Contractile event dynamics in Frl loss of function (DC).** Live  
747 100x imaging of F-Actin (eGFP::UtrCH) in amnioserosa cells during dorsal closure (DC). Left  
748 panel : control embryo, right panel :  $frl^{59/59}$  (null mutant) embryo. The movie represents a max.  
749 proj. of the 2 most apical z-planes, spaced by  $0.33\ \mu\text{m}$  and acquired every 2 seconds.

750 **Supplementary Mov. 22 | Automated pulse and KLT tracking (DC).** Live 100x imaging of  
751 MyoII (Sqh::mKate2, left panel) and F-Actin (eGFP::UtrCH, right panel) in amnioserosa cells  
752 during dorsal closure (DC). Left panel : automated MyoII pulse tracking in space, the white  
753 crosses represent the medial MyoII centre of mass. Right panel : F-Actin KLT tracked particles,  
754 the color code represents the speed of tracked particles in  $\mu\text{m}\cdot\text{s}^{-1}$ . The movie represents a max.  
755 proj. of the 4 most apical z-planes, spaced by  $0.33\ \mu\text{m}$  and acquired every 5 seconds.

756 **Supplementary Mov. 23 | Numerical model.** Representative simulations for different values  
757 of  $\lambda$  (10 examples per condition). The pulse is represented by the inner circle and the  
758 green segments indicate that a boundary element is connected to the pulse. The pulse position  
759 is chosen randomly in the different examples.

## 760 **Materials and Methods**

---

### 761 **Fly strains and genetics**

762 We visualized the F-Actin dynamics in living embryos using a sqh-eGFP::UtrCH (Calponin  
763 Homology domain of Utrophin) insertion either on the 2<sup>nd</sup> or 3<sup>rd</sup> chromosome<sup>7</sup>. To co-image  
764 the F-Actin with the MyoII, we recombined the eGFP::UtrCH with a fluorescent version of the  
765 *Drosophila* MyoII-RLC (encoded by the *spaghetti-squash* or *sqh* gene) using a sqh-  
766 Sqh::mCherry or a sqh-Sqh::mKate2 insertion. In both cases, these Sqh constructs were inserted  
767 either on the K18 site (53B2) on the 2<sup>nd</sup> chromosome or the VK27 (89E11) on the 3<sup>rd</sup>  
768 chromosome. To monitor the Rho1 GTPase activity *in vivo* we used the Rho1GTP sensor ubi-  
769 AnillinRBD::eGFP (Rho Binding Domain of anillin) inserted on the 3<sup>rd</sup> chromosome<sup>13</sup>.

770 The 67-Gal4 (mat-4-GAL-VP16) or the *engrailed*-GAL4 (en2.4-GAL4e16E, UAS-NLS::RFP,  
771 BDSC #30557) drivers, carried on the 2<sup>nd</sup> chromosome, have been combined to sqh-  
772 eGFP::UtrCH, sqh-Sqh::mKate2 or ubi-AnillinRBD::eGFP on the 3<sup>rd</sup> chromosome and were  
773 used to express the following constructs : UAS-Rho1N19 (BDSC #58818), UAS-Frl<sup>WT</sup> (gift  
774 from Andreas Jenny)<sup>45</sup> and UAS-Frl<sup>shRNA</sup> (CG32138 TRiP line, BDSC #32447). The RhoGEF2  
775 germline clones, using the RhoGEF2<sup>l(2)04291</sup> null allele<sup>54</sup>, have been made using the FLP-DFS  
776 system<sup>55</sup>.

777 To visualize the effect of a ubiquitous overexpression of Frl (Frl<sup>OE</sup>) in ectodermal cells during  
778 GBE we crossed 67-GAL4/+ ; UAS-Frl<sup>WT</sup>/+ females with UAS-Frl<sup>WT</sup>/UAS-Frl<sup>WT</sup> males  
779 (maternal/zygotic Frl overexpression). To visualize the effect of a ubiquitous overexpression of  
780 Frl (Frl<sup>OE</sup>) in amnioserosa cells during DC we crossed 67-GAL4/67-GAL4 ; +/+ females with  
781 UAS-Frl<sup>WT</sup>/UAS-Frl<sup>WT</sup> males (zygotic Frl overexpression). To reduce the endogenous Frl  
782 levels using shRNA we crossed 67-GAL4/+ ; UAS-Frl<sup>shRNA</sup>/+ females with UAS-Frl UAS-  
783 Frl<sup>shRNA</sup>/UAS-Frl UAS-Frl<sup>shRNA</sup> males (maternal/zygotic Frl shRNA expression). To drive the  
784 expression of Rho1N19 or the overexpression of Frl in isolated amnioserosa cells during DC,  
785 we respectively crossed *engrailed*-GAL4, UAS-NLS::RFP/CyO ; +/+ females with UAS-  
786 Rho1N19/CyO or UAS-Frl<sup>WT</sup>/UAS-Frl<sup>WT</sup> males (zygotic mosaic expression/overexpression).  
787 The nuclear NLS::RFP signal have been used as a reporter to identify the isolated amnioserosa  
788 cells expressing the *engrailed*-GAL4 driver. Looking at the distribution of nuclear NLS::RFP  
789 intensities we defined a threshold to categorize cells between controls and overexpressing cells  
790 (see Fig. 3b).

## 791 **Constructs and transgenesis**

792 The *fri<sup>l59</sup>* mutant was generated by the CRISPR/Cas9 technique<sup>56</sup>. In brief, two 21 nt long  
793 gRNAs, GAGCAACTTTGCTTTATCCGG and GTCGTTTATCGCGCACCCCTGG, were  
794 designed with homology to the second and last coding exons of *fri*, respectively, and cloned  
795 into the pCFD4 vector. After germ cell-specific simultaneous expression of Cas9 and the  
796 gRNAs, we collected *fri* mutant candidates from the second generation which were validated  
797 by PCR and sequencing. Based on the sequencing data, the expected ~ 8640 bps deletion was  
798 detected from the genomic DNA of the mutant strains. We next associated the null *fri<sup>l59</sup>* allele  
799 (3<sup>rd</sup> chromosome) with a *sqh-eGFP::UtrCH*, *sqh-Sqh::mKate2* recombinant carried on the 2<sup>nd</sup>  
800 chromosome. From this stock, we selected male and female adult fly homozygote for *Fri<sup>l59</sup>* and  
801 cross them together to study the effect of a maternal/zygotic depletion of *Fri* on the actomyosin  
802 dynamics.

## 803 **Live imaging**

804 Embryos were prepared for live imaging as previously described<sup>57</sup> and movies were acquired  
805 at room temperature (22°C) at stage 7-8 for ectodermal cells during GBE and at stage 13-14 for  
806 amnioserosa cells during DC. All live imaging has been performed using a dual camera  
807 (QImaging, Rolera EM-C<sup>2</sup>, EMCCD) spinning disc (CSU-X1, Yokogawa) on a Nikon Eclipse  
808 Ti inverted microscope (distributed by Roper) managed by the MetaMorph software. Dual color  
809 imaging of eGFP and mCherry/mKate2 FPs was obtained by simultaneously exciting  
810 fluorophores with a 491 nm and a 561 nm laser and using a dichroic mirror to collect emission  
811 signals on two cameras. We used the following Nikon objectives : 10X/N.A. 0.25 dry,  
812 40X/N.A. 1.25 water and a 100X/N.A. 1.4 oil. For the 100X movies, we focused on the most  
813 apical part of epithelial cells, performing Z-series of 1 to 6 planes separated by 0.33 µm and  
814 acquired every 1 to 10 seconds (see exact imaging conditions in the supplementary movies  
815 legend). For the 40X movies (Fig. 6c-f), we searched to monitor epithelial dynamics and filmed  
816 for that only one optical section at the AJs level every 20 seconds. For the 10X movies (Fig.  
817 6g-i), we imaged Z-series of 10 planes separated by 5 µm every 3 minutes, to capture most of  
818 the embryo volume over the duration of the DC process. In all cases, imaging conditions  
819 (exposure time, laser power) were optimized and kept constant between controls and perturbed  
820 embryos.

## 821 **Drug injections**

822 To inhibit the Rho1 GTPase in ectodermal cells during GBE, we injected the C3-transferase  
823 exoenzyme (from Cytoskeleton, Inc), resuspended in water at 0.5  $\mu\text{g}/\mu\text{l}$ , in the yolk of pre-  
824 gastrulating embryos. Injections had to be performed just before the end of cellularization to  
825 allow this non-cell permeable drug to penetrate the cells without impairing, too early, the first  
826 movement of gastrulation. To inhibit the Rok kinase in amnioserosa cells during DC, we  
827 injected the H-1152 compound (from Tocris Bioscience), resuspended in water at 40 mM, in  
828 the perivitelline space of embryos. Before the injections, the embryos were slightly dried by  
829 being exposed during  $\sim 7$  min to the Drierite (Sigma-Aldrich), to prevent cells from being  
830 expelled from the vitelline shell. Injections have been performed on the imaging microscope  
831 using an InjectMan4 micromanipulator and a FemtoJet 4i microinjector from Eppendorf.  
832 Embryos were imaged either  $\sim 10$  min (C3-transferase) or  $\sim 2$  min (H-1152) after injection.

### 833 **Embryos fixation and phalloidin staining**

834 To validate the eGFP::*UtrCH* probe, we compare the live localization of F-Actin obtained using  
835 the probe with fixed embryos stained by phalloidin (Supplementary Fig. 1a). To do so, we fixed  
836 embryos in a half-half mix of heptane and 8% paraformaldehyde (diluted in PBS) for 30  
837 minutes under constant shaking. The embryos were then washed in PBS 10% BSA and hand  
838 devitellinized using a thin syringe needle. We next incubated embryos for 2 hours at room  
839 temperature in a blocking/permeabilizing PBS 10% BSA + 0.3% triton X-100 solution. The  
840 OregonGreen 488 phalloidin (from Invitrogen) was diluted 1/50 in PBS 10% BSA and the  
841 staining was performed at room temperature for 30 minutes. Before mounting, the embryos  
842 were washed a last time in PBS without BSA. Imaging was performed on a Leica LSM SP8  
843 microscope using a 100X/N.A. 1.4 oil objective.

### 844 **Image processing and data analysis**

#### 845 Used software

846 All image processing and data analysis have been performed using the ImageJ or Matlab  
847 software, either separately or together using the MIJ plugin (D.Sage, D.Prodanov, C.Ortiz and  
848 JY.Tivenez, retrieved from <http://bigwww.epfl.ch/sage/soft/mij>). The graphics were produced  
849 using OriginPro software and exported to Adobe Illustrator for final processing.

#### 850 Automatic cell segmentation



851 To measure fluorescence intensities in the medio-apical cortex, we first designed an automated  
852 cell segmentation procedure based on watershed algorithms ([Supplementary Fig. 1b](#)). To  
853 achieve this, we used the eGFP::UtrCH signal from the lower planes of our Z-series (AJs  
854 planes) and reduce the images size (x 0.33) to speed up the procedure. We then run the  
855 *DIPimage* watershed algorithm (retrieved from <http://www.diplib.org/dipimage>) and made a  
856 custom Matlab/ImageJ code to select and track segmented cells over time. If required  
857 (especially for the 40x movies), we manually corrected the segmentation results using the  
858 Tissue Analyzer ImageJ plugin (B.Aigouy, retrieved from [https://grr.gred-](https://grr.gred-clermont.fr/labmirouse/software/WebPA)  
859 [clermont.fr/labmirouse/software/WebPA](https://grr.gred-clermont.fr/labmirouse/software/WebPA))<sup>58</sup>. The Tissue Analyzer plugin was also used in [Fig.](#)  
860 [6c-f](#) for automatic detection of irreversible T1 events (cell intercalation).

### 861 Image processing and measurements

862 To prepare the 100X images for quantification we first maximum-projected our Z-series over  
863 the 2 to 4 most apical planes. We then evaluated and subtracted the cytoplasmic background by  
864 measuring fluorescence intensities on the lower Z-planes. For this purpose, we projected the  
865 lower planes as we did for the apical planes and manually drew circular ROIs to measure the  
866 cytoplasmic levels ([Supplementary Fig. 1c](#)). This step is critical to properly measure the total  
867 amount of fluorescence in the ever-changing apical cell surface. For example, without  
868 background subtraction, pulses cannot be properly timed since the fluctuations of the apical  
869 surface introduce a shift in the measurement of medial fluorescence levels. Finally, we  
870 measured the medio-apical fluorescence intensities using the ROIs obtained by segmenting the  
871 cells and shrunk these ROIs, by 10 pixels for ectodermal cells or 15 pixels for amnioserosa  
872 cells, to prevent the junctional signal from contaminating the measurements. According to  
873 cases, we either measured the mean or the integrated medial fluorescence intensities to,  
874 respectively, get information about the density or the total levels of the considered fluorescent  
875 protein.

### 876 Measuring the level of pulsed contractility

877 During this study we repeatedly assessed the level of pulsed contractility by comparing the  
878 medial actomyosin pulsatility and the apical cell area fluctuations ([Fig. 2f](#) ; [3d,g](#) ; [5c,d,g](#) ; [6e](#)).  
879 To do so, we measured the standard deviations (SDs) of individual cell profiles after  
880 normalizing data to the mean and removing the low frequency components using an IIR  
881 Butterworth high-pass filter (Matlab signal processing toolbox). We choose a cutoff frequency

882 (1/300s for ectodermal cells during GBE and 1/600s for amnioserosa cells during DC) that we  
883 multiply by 0.75 or 1.25 to respectively define the stop and the pass band frequency  
884 (Supplementary Fig. 1d). The high-pass filter allowed us to isolate the effect of pulsed  
885 contractility by discarding the contribution of slower variations of the apical surface. Indeed, it  
886 appeared that the apical cortex tends to steadily increase/decrease its surface over the time of  
887 recording (~450 seconds for GBE or ~900 seconds for DC) influencing, therefore, our SDs  
888 measurements. Removing the low frequency components revealed particularly required to  
889 measure the F-Actin pulsatility since the density of medial filaments tend to scale with the  
890 apical cell surface.

### 891 Cross-correlation analysis

892 To evaluate how the pulsatile F-Actin accumulations synchronizes with the MyoII pulses and  
893 the cycles of apical constriction we performed a cross-correlation analysis, comparing the  
894 variation of the total medial F-Actin levels with either the variation of the total medial MyoII  
895 levels or the fluctuation of apical cell area (Fig. 1i,j). In both cases, we pre-processed our data  
896 using a mean normalization and a high-pass filter (see above). The normalized cross-correlation  
897 have been calculated for individual cells using the following formula, where  $t$  is the time,  $T$  is  
898 the total time of analysis and  $\tau$  is the time delay:

$$899 \quad C_N(\tau) = \frac{\int_0^T (f(t) - \bar{f}) \cdot (g(t + \tau) - \bar{g}) dt}{\sqrt{\int_0^T (f(t) - \bar{f})^2 dt} \cdot \sqrt{\int_0^T (g(t) - \bar{g})^2 dt}}$$

900 The mean cross-correlation curves have been obtained by averaging the individual cell results  
901 and the typical time delay have been plotted considering the maximum correlation for the F-  
902 Actin/MyoII comparison and the minimum correlation for the F-Actin/apical cell area  
903 comparison.

### 904 Quantifying the pulsatile Rho1 activity

905 To quantify the levels of Rho1 activity during pulses we measured the amplitude of  
906 AniRBD::eGFP accumulations during contractile events (Rho1GTP sensor) (Fig. 5h-j).  
907 However, since we were unable to segment cells using the AniRBD::eGFP signal, we designed  
908 a live pulse tracking procedure working directly on unsegmented images (Supplementary Fig.  
909 ??). To do so, we used a Matlab implementation of the DBSCAN clustering algorithm (S.

910 Mostapha Kalami Heris, retrieved from <http://yarpiz.com/255/ypml110-dbscan-clustering>)  
911 integrated to a custom code for automatization. This method allowed us to isolate clusters of  
912 AniRBD::eGFP signal based on two main parameters : the distance  $\epsilon$  and the minimum number  
913 of points that must be within an  $\epsilon$  radius for these points to be considered as a cluster. We then  
914 converted these clusters into ROIs, using convex hulls (minimum area polygon containing the  
915 cluster), and tracked overlapping ROIs over time to follow individual pulses. After filtering  
916 pulses, based on ROIs sizes and tracks duration criterions, we measured the amplitude of  
917 AniRBD::eGFP pulses by measuring the maximum of total fluorescence intensity for each  
918 track.

### 919 Cell shape regularity measurements

920 To measure how regularly cells were shaped, we compared the segmented cell boundary with  
921 the convex hull formed by connecting vertices (Fig. 6j-l ; 7g). We next quantified the area  
922 occupied by the inward/outward convolutions of the actual cell shape and divided it by the  
923 surface of the convex hull. In doing so, we obtained a ratio whose value indicates the  
924 convolution level of the segmented cell shape (the higher the value the more convoluted is the  
925 shape). We calculated this ratio for every cell at every time point and then compare it between  
926 conditions.

### 927 KLT / pulse analysis

928 To quantify the propagation of MyoII pulsatile stresses within the cortex, we measured the  
929 speed at which tracked apical F-Actin structures (eGFP::UtrCH signal) displace toward the  
930 pulse center during contractile events. We first tracked these apical F-Actin structures using a  
931 Kanade-Lucas-Tomasi features tracking algorithm (KLT)<sup>59,60</sup> implemented in C (S.Birchfield,  
932 retrieved from <https://cecas.clemson.edu/~stb/klf>) whose tracking results have been exported to  
933 Matlab for further processing. Briefly, the KLT algorithm first detects discrete features within  
934 the image by examining the minimum eigenvalue of each 2 by 2 gradient matrix. These features  
935 are then tracked over time following a Newton-Raphson method of minimizing the difference  
936 between the two windows. Finally, to minimize tracking mistakes, each feature is checked by  
937 an affine consistency test, comparing the spatial distribution of the feature and its neighbors at  
938 given time-point to the time-point at which the feature was first detected<sup>61</sup>. In our case, since  
939 the medio-apical F-Actin is in a constant reorganization, we were not able to follow features  
940 over long periods and therefore had to replace them during the movie in order to produce

941 enough data. Considering only the tracks whose duration exceed three time-points, we obtained  
942 in average ~ 50,000 tracks per embryo, each of these containing the x y coordinates of the  
943 tracked feature.

944 We next sought to detect pulses, in time and space, in order to define the reference points from  
945 which our propagation measurements were made. To do so, we first designed an automated  
946 pulse detection procedure, working on the smoothed derivatives of high-pass filtered total  
947 medial MyoII levels (see Auto. pulse detection (time) in [Supplementary Fig. 2b](#)). This  
948 procedure, based on the “findpeaks” function of the Matlab Signal Processing Toolbox, allowed  
949 us to detect and define temporal landmarks within pulses ( $t_i$  : initial time ;  $t_{d_{max}}$  : max derivative  
950 ;  $t_{max}$  : max amplitude ;  $t_{d_{min}}$  : min derivative ;  $t_f$  : final time) and to adjust the detection  
951 sensitivity using parameters such as the peak prominence, the peak width and the peak  
952 prominence over width ratio. In a second time, we implemented another Matlab routine to  
953 monitor the medial MyoII center of mass within contracting cells (see Auto. pulse detection  
954 (space) in [Supplementary Fig. 2c](#)). To perform this analysis, we first removed the junctional  
955 MyoII (post-processing) and used a combination of gaussian blurs and thresholding steps to  
956 isolate the MyoII signal actually belonging to a pulse. Once defined, we averaged the positions  
957 of the MyoII center of mass between the  $t_{d_{max}}$  and  $t_{d_{min}}$  time-points and used this reference point  
958 (pulse center) for our propagation measurements ([Fig. 7d](#)).

959 Finally, to produce the propagation curves in [Fig. 7e](#) we averaged the speed, between  $t_{d_{max}}$  and  
960  $t_{d_{min}}$ , at which the KLT tracked apical F-Actin structures converge toward the pulse center  
961 (define as describe above). This averaging step allowed us to smooth the curve profile and to  
962 focus only on the period corresponding to the apical cell contraction (convergence of apical F-  
963 Actin structures). We then binned data according to the distance and plotted the measured speed  
964 toward the pulse as a function of the distance to the pulse.

## 965 **Numerical modeling**

966 We consider a single cell submitted to a contraction due to an actomyosin pulse. The cell is  
967 represented by a discretized contour of N attachment sites (we use N=100 in the simulations).  
968 Six of the sites represent the vertices of the cell. Initially, they are regularly distributed along  
969 the contour. The sites are submitted to the following forces:

970 - An area constraint in the form of cell area elasticity:

971 
$$\vec{F}_A = -k_A(A - A_0) \vec{u}_r$$

972  $k_A$  is the area stiffness, i.e. the strength associated to the area constraint,  $A$  is the area of the  
 973 cell,  $A_0$  its target area, and  $\vec{u}_r$  the unit radial vector. The origin is taken at the cell center of  
 974 mass.

975 - A line tension along the cell contour. The site  $i$  pulls on the neighboring sites  $i - 1$  and  $i + 1$ :

$$976 \quad \vec{T}_{i,i\pm 1} = -\gamma l_{i,i\pm 1} \vec{u}_{i,i\pm 1}$$

977  $\gamma$  is the line tension constant,  $l_{i,i\pm 1}$  the distance between sites  $i$  and  $i \pm 1$ , and  $\vec{u}_{i,i\pm 1}$  the unit  
 978 vector along the segment joining sites  $i$  and  $i \pm 1$ .

979 - To mimic the traction of adjacent cell junctions on vertices, we assume that sites  
 980 corresponding to vertices undergo an additional elastic force:

$$981 \quad \vec{F}_v = -k_v l_v \vec{u}_v$$

982  $k_v$  is the strength associated to the elastic force, and  $l_v$  the distance of the vertex to its initial  
 983 position.  $\vec{u}_v$  is the unit vector along the segment joining the vertex to its initial position.

984 - An active contraction force distributed among the connected attachment sites. The contraction  
 985 force on site  $i$  is:

$$986 \quad \vec{F}_c^i = -\chi_i C(t) \vec{u}_p^i$$

987 Where  $\chi_i$  is either 1 or 0 (connected / not connected, see below),  $C(t)$  is the amplitude of the  
 988 contraction force, and  $\vec{u}_p^i$  is the unit vector along the segment joining site  $i$  to the pulse center.

989 In each simulation, the position of the pulse center is chosen randomly anywhere inside the cell.  
 990 The probability that a site of the cell contour is connected to the pulse depends on its distance  
 991  $d_i$  to the pulse:

$$992 \quad p_i = e^{-d_i/\lambda}$$

993  $\lambda$  is a connectivity length scale, and a direct indicator of network density. A sparse network will  
 994 result in a short  $\lambda$ , while a dense network will result in a long  $\lambda$ . Note that we consider that the  
 995 pulse has a non-zero spatial extension, with radius  $r_p$ . The probability that an attachment site  
 996 within the pulse radius is connected to the pulse is equal to 1. Hence the distance  $d_i$  is computed  
 997 as the distance to the pulse circumference.

998 The amplitude of the contraction force  $C(t)$  is:

$$999 \quad C(t) = \frac{C_0}{N_c} \frac{1}{2} (1 - \cos(2\pi t/\theta))$$

1000 The amplitude on each site  $C_0/N_c$  is normalized to the number of connected sites  $N_c$  so that the  
 1001 total work produced does not depend on the number of connected sites. We assume that the  
 1002 contraction amplitude oscillates with period  $\theta$ . Due to the periodicity, we limit the simulations  
 1003 to one period.



1004 The dynamics is simulated by solving the force balance equation, assuming a fluid friction force  
1005 with friction coefficient  $\alpha$ :

1006 
$$\frac{d\vec{x}_i}{dt} = \frac{1}{\alpha} (\vec{F}_A^i + \vec{T}_i + \vec{F}_v^i + \vec{F}_c^i)$$

1007 In our simulations, we used  $A_0 = 170 \mu\text{m}^3$ ,  $r_p = 3.5 \mu\text{m}$ ,  $\theta = 200 \text{ s}$ ,  $\gamma = 120$ ,  $\alpha = 5$ ,  $k_A =$   
1008  $0.05$ ,  $k_v = 30$  and  $C_0 = 500$ . Note that with these parameters, the initial (equilibrium)  
1009 configuration before the contraction starts is a hexagon. We used different values of  $\lambda$  ranging  
1010 from  $2\mu\text{m}$  to  $100\mu\text{m}$  to illustrate the role of connectivity.

### 1011 **Statistics**

1012 Data points from different pulses/cells/embryos were pooled to estimate the mean, S.D. and  
1013 S.E.M. Statistical significances have been tested using two-sample t-test, assuming normal  
1014 distributions and unequal variances. No statistical method was used to predetermine sample  
1015 size. The experiments were not randomized, and the investigators were not blinded to allocation  
1016 during experiments and outcome assessment.

### 1017 **Data and codes availability**

1018 The authors declare that the data and the analysis methods supporting the findings of this study  
1019 are available within the paper and its supplementary information files. Raw image data and  
1020 code are available upon request.

## 1021 References

---

- 1022 1. Levayer, R. & Lecuit, T. Biomechanical regulation of contractility: spatial control and  
1023 dynamics. *Trends Cell Biol.* **22**, 61–81 (2012).
- 1024 2. Salbreux, G., Charras, G. & Paluch, E. Actin cortex mechanics and cellular  
1025 morphogenesis. *Trends Cell Biol.* **22**, 536–545 (2012).
- 1026 3. Munro, E., Nance, J. & Priess, J. R. Cortical Flows Powered by Asymmetrical  
1027 Contraction Transport PAR Proteins to Establish and Maintain Anterior-Posterior  
1028 Polarity in the Early *C. elegans* Embryo. *Dev. Cell* **7**, 413–424 (2004).
- 1029 4. Martin, A. C., Kaschube, M. & Wieschaus, E. F. Pulsed contractions of an actin–  
1030 myosin network drive apical constriction. *Nature* **457**, 495–499 (2009).
- 1031 5. Solon, J., Kaya-Çopur, A., Colombelli, J. & Brunner, D. Pulsed Forces Timed by a  
1032 Ratchet-like Mechanism Drive Directed Tissue Movement during Dorsal Closure. *Cell*  
1033 **137**, 1331–1342 (2009).
- 1034 6. Blanchard, G. B., Murugesu, S., Adams, R. J., Martinez-Arias, A. & Gorfinkiel, N.  
1035 Cytoskeletal dynamics and supracellular organisation of cell shape fluctuations during  
1036 dorsal closure. *Development* **137**, 2743–2752 (2010).
- 1037 7. Rauzi, M., Lenne, P. F. & Lecuit, T. Planar polarized actomyosin contractile flows  
1038 control epithelial junction remodelling. *Nature* **468**, 1110–1115 (2010).
- 1039 8. He, L., Wang, X., Tang, H. L. & Montell, D. J. Tissue elongation requires oscillating  
1040 contractions of a basal actomyosin network. *Nat. Cell Biol.* **12**, 1133–1142 (2010).
- 1041 9. Kim, H. Y. & Davidson, L. A. Punctuated actin contractions during convergent  
1042 extension and their permissive regulation by the non-canonical Wnt-signaling pathway.  
1043 *J. Cell Sci.* **124**, 635–646 (2011).
- 1044 10. Maître, J.-L., Niwayama, R., Turlier, H., Nédélec, F. & Hiiragi, T. Pulsatile cell-  
1045 autonomous contractility drives compaction in the mouse embryo. *Nat. Cell Biol.* **17**,  
1046 849–855 (2015).
- 1047 11. Bement, W. M. *et al.* Activator–inhibitor coupling between Rho signalling and actin  
1048 assembly makes the cell cortex an excitable medium. *Nat. Cell Biol.* **17**, 1471–1483  
1049 (2015).
- 1050 12. Dierkes, K., Sumi, A., Solon, J. & Salbreux, G. Spontaneous Oscillations of Elastic  
1051 Contractile Materials with Turnover. *PRL* **148102**, 1–5 (2014).
- 1052 13. Munjal, A., Philippe, J.-M., Munro, E. & Lecuit, T. A self-organized biomechanical  
1053 network drives shape changes during tissue morphogenesis. *Nature* **524**, 351–355  
1054 (2015).
- 1055 14. Nishikawa, M., Naganathan, S. R., Jülicher, F. & Grill, S. W. Controlling contractile  
1056 instabilities in the actomyosin cortex. *Elife* **6**, 1–21 (2017).

- 1057 15. Michaux, J. B., Robin, F. B., McFadden, W. M. & Munro, E. M. Excitable RhoA  
1058 dynamics drive pulsed contractions in the early *C. elegans* embryo. *J. Cell Biol.* 1–23  
1059 (2018). doi:10.1083/jcb.201806161
- 1060 16. Azevedo, D. *et al.* DRhoGEF2 Regulates Cellular Tension and Cell Pulsations in the  
1061 Amnioserosa during *Drosophila* Dorsal Closure. *PLoS One* **6**, e23964 (2011).
- 1062 17. Campellone, K. G. & Welch, M. D. A nucleator arms race: Cellular control of actin  
1063 assembly. *Nat. Rev. Mol. Cell Biol.* **11**, 237–251 (2010).
- 1064 18. Blanchoin, L., Boujemaa-Paterski, R., Sykes, C. & Plastino, J. Actin Dynamics,  
1065 Architecture, and Mechanics in Cell Motility. *Physiol. Rev.* **94**, 235–263 (2014).
- 1066 19. Skau, C. T. & Waterman, C. M. Specification of Architecture and Function of Actin  
1067 Structures by Actin Nucleation Factors. *Annu. Rev. Biophys.* **44**, 285–310 (2015).
- 1068 20. Clark, A. G., Wartlick, O., Salbreux, G. & Paluch, E. K. Stresses at the Cell Surface  
1069 during Animal Cell Morphogenesis. *Curr. Biol.* **24**, R484–R494 (2014).
- 1070 21. Murrell, M., Oakes, P. W., Lenz, M. & Gardel, M. L. Forcing cells into shape: the  
1071 mechanics of actomyosin contractility. *Nat. Rev. Mol. Cell Biol.* **16**, 486–498 (2015).
- 1072 22. Chugh, P. *et al.* Actin cortex architecture regulates cell surface tension. *Nat. Cell Biol.*  
1073 **19**, 689–697 (2017).
- 1074 23. Mayer, M., Depken, M., Bois, J. S., Jülicher, F. & Grill, S. W. Anisotropies in cortical  
1075 tension reveal the physical basis of polarizing cortical flows. *Nature* **467**, 617–621  
1076 (2010).
- 1077 24. Burkel, B. M., Von Dassow, G. & Bement, W. M. Versatile fluorescent probes for  
1078 actin filaments based on the actin-binding domain of utrophin. *Cell Motil. Cytoskeleton*  
1079 **64**, 822–832 (2007).
- 1080 25. Nemoto, Y., Namba, T., Kozaki, S. & Narumiya, S. Clostridium botulinum C3 ADP-  
1081 ribosyltransferase gene. *Biol. Chem.* **266**, 19312–19319 (1991).
- 1082 26. Mason, F. M., Xie, S., Vasquez, C. G., Tworoger, M. & Martin, A. C. RhoA GTPase  
1083 inhibition organizes contraction during epithelial morphogenesis. *J. Cell Biol.* **214**,  
1084 603–617 (2016).
- 1085 27. Serrano, L., Fernandez-Ballester, G. J., Seher, T., Leptin, M. & Kolsch, V. Control of  
1086 *Drosophila* Gastrulation by Apical Localization of Adherens Junctions and RhoGEF2.  
1087 *Science (80-. )*. **315**, 384–386 (2007).
- 1088 28. Kerridge, S. *et al.* Modular activation of Rho1 by GPCR signalling imparts polarized  
1089 myosin II activation during morphogenesis. *Nat. Cell Biol.* **18**, 261–270 (2016).
- 1090 29. Tse, Y. C. *et al.* RhoA activation during polarization and cytokinesis of the early  
1091 *Caenorhabditis elegans* embryo is differentially dependent on NOP-1 and CYK-4. *Mol.*  
1092 *Biol. Cell* **23**, 4020–4031 (2012).
- 1093 30. Bertet, C., Sulak, L. & Lecuit, T. Myosin-dependent junction remodelling controls

- 1094 planar cell intercalation and axis elongation. *Nature* **429**, 667–671 (2004).
- 1095 31. Blankenship, J. T., Backovic, S. T., Sanny, J. S. S. P., Weitz, O. & Zallen, J. A.  
1096 Multicellular Rosette Formation Links Planar Cell Polarity to Tissue Morphogenesis.  
1097 *Dev. Cell* **11**, 459–470 (2006).
- 1098 32. Collinet, C., Rauzi, M., Lenne, P.-F. & Lecuit, T. Local and tissue-scale forces drive  
1099 oriented junction growth during tissue extension. *Nat. Cell Biol.* **17**, 1247–1258 (2015).
- 1100 33. Lye, C. M. *et al.* Mechanical Coupling between Endoderm Invagination and Axis  
1101 Extension in *Drosophila*. *PLOS Biol.* **13**, e1002292 (2015).
- 1102 34. Wells, A. R. *et al.* Complete canthi removal reveals that forces from the amnioserosa  
1103 alone are sufficient to drive dorsal closure in *Drosophila*. *Mol. Biol. Cell* **25**, 3552–  
1104 3568 (2014).
- 1105 35. Pasakarnis, L., Frei, E., Caussinus, E., Affolter, M. & Brunner, D. Amnioserosa cell  
1106 constriction but not epidermal actin cable tension autonomously drives dorsal closure.  
1107 *Nat. Cell Biol.* **18**, 1161–1172 (2016).
- 1108 36. Ma, X., Lynch, H. E., Scully, P. C. & Hutson, M. S. Probing embryonic tissue  
1109 mechanics with laser hole drilling. *Phys. Biol.* **6**, 36004 (2009).
- 1110 37. Fritzsche, M., Lewalle, A., Duke, T., Kruse, K. & Charras, G. Analysis of turnover  
1111 dynamics of the submembranous actin cortex. *Mol. Biol. Cell* **24**, 757–767 (2013).
- 1112 38. Bambardekar, K., Clément, R., Blanc, O., Chardès, C. & Lenne, P.-F. Direct laser  
1113 manipulation reveals the mechanics of cell contacts in vivo. *Proc. Natl. Acad. Sci.* **112**,  
1114 1416–1421 (2015).
- 1115 39. Clément, R., Dehapiot, B., Collinet, C., Lecuit, T. & Lenne, P.-F. Viscoelastic  
1116 Dissipation Stabilizes Cell Shape Changes during Tissue Morphogenesis. *Curr. Biol.*  
1117 **27**, 3132–3142.e4 (2017).
- 1118 40. Stauffer, D. & Aharony, A. *Introduction To Percolation Theory*. (Taylor & Francis,  
1119 1994).
- 1120 41. Block, J. *et al.* FMNL2 drives actin-based protrusion and migration downstream of  
1121 Cdc42. *Curr. Biol.* **22**, 1005–1012 (2012).
- 1122 42. Kühn, S. *et al.* The structure of FMNL2-Cdc42 yields insights into the mechanism of  
1123 lamellipodia and filopodia formation. *Nat. Commun.* **6**, (2015).
- 1124 43. Kage, F. *et al.* FMNL formins boost lamellipodial force generation. *Nat. Commun.* **8**,  
1125 (2017).
- 1126 44. Wakayama, Y., Fukuhara, S., Ando, K., Matsuda, M. & Mochizuki, N. Cdc42 mediates  
1127 Bmp - Induced sprouting angiogenesis through Fmnl3-driven assembly of endothelial  
1128 filopodia in zebrafish. *Dev. Cell* **32**, 109–122 (2015).
- 1129 45. Dollar, G. *et al.* Unique and Overlapping Functions of Formins Frl and DAAM During  
1130 Ommatidial Rotation and Neuronal Development in *Drosophila*. *Genetics* **202**, 1135–

- 1131 1151 (2016).
- 1132 46. Yayoshi-Yamamoto, S., Taniuchi, I. & Watanabe, T. FRL, a Novel Formin-Related  
1133 Protein, Binds to Rac and Regulates Cell Motility and Survival of Macrophages. *Mol.*  
1134 *Cell. Biol.* **20**, 6872–6881 (2002).
- 1135 47. Levayer, R. & Lecuit, T. Oscillation and Polarity of E-Cadherin Asymmetries Control  
1136 Actomyosin Flow Patterns during Morphogenesis. *Dev. Cell* **26**, 162–175 (2013).
- 1137 48. Jodoin, J. N. *et al.* Stable Force Balance between Epithelial Cells Arises from F-Actin  
1138 Turnover. *Dev. Cell* **35**, 685–697 (2015).
- 1139 49. Coravos, J. S. & Martin, A. C. Apical Sarcomere-like Actomyosin Contracts  
1140 Nonmuscle *Drosophila* Epithelial Cells. *Dev. Cell* **39**, 346–358 (2016).
- 1141 50. Alvarado, J., Sheinman, M., Sharma, A., MacKintosh, F. C. & Koenderink, G. H.  
1142 Molecular motors robustly drive active gels to a critically connected state. *Nat. Phys.* **9**,  
1143 591–597 (2013).
- 1144 51. Ennomani, H. *et al.* Architecture and Connectivity Govern Actin Network  
1145 Contractility. *Curr. Biol.* **26**, 616–626 (2016).
- 1146 52. Stam, S. *et al.* Filament rigidity and connectivity tune the deformation modes of active  
1147 biopolymer networks. *Proc. Natl. Acad. Sci.* **114**, E10037–E10045 (2017).
- 1148 53. Ding, W. Y. *et al.* Plastin increases cortical connectivity to facilitate robust polarization  
1149 and timely cytokinesis. *J. Cell Biol.* **216**, 1371–1386 (2017).
- 1150 54. Häcker, U. & Perrimon, N. DRhoGEF2 encodes a member of the Dbl family of  
1151 oncogenes and controls cell shape changes during gastrulation in *Drosophila*. *Genes*  
1152 *Dev.* **12**, 274–284 (1998).
- 1153 55. Chou, T. Bin & Perrimon, N. The autosomal FLP-DFS technique for generating  
1154 germline mosaics in *Drosophila melanogaster*. *Genetics* **144**, 1673–1679 (1996).
- 1155 56. Gratz, S. J. *et al.* Genome engineering of *Drosophila* with the CRISPR RNA-guided  
1156 Cas9 nuclease. *Genetics* **194**, 1029–1035 (2013).
- 1157 57. Cavey, M. & Lecuit, T. Imaging Cellular and Molecular Dynamics in Live Embryos  
1158 Using Fluorescent Proteins. in *Drosophila: Methods and Protocols* (ed. Dahmann, C.)  
1159 219–238 (Humana Press, 2008). doi:10.1007/978-1-59745-583-1\_13
- 1160 58. Aigouy, B. *et al.* Cell Flow Reorients the Axis of Planar Polarity in the Wing  
1161 Epithelium of *Drosophila*. *Cell* **142**, 773–786 (2010).
- 1162 59. Lucas, B. D. & Kanade, T. An Iterative Image Registration Technique with an  
1163 Application to Stereo Vision. in *Proceedings of the 7th International Joint Conference*  
1164 *on Artificial Intelligence - Volume 2* 674–679 (Morgan Kaufmann Publishers Inc.,  
1165 1981).
- 1166 60. Tomasi, C. & Kanade, T. Detection and tracking of point features. *Carnegie Mellon*  
1167 *Univ. Tech. Rep.* CMU-CS-91–132 (1991).



- 1168 61. Shi, J. & Tomasi, C. Good Features to Track 2 Two Models of Image Motion 3  
1169 Computing Image Motion. *IEEE Conf. Comput. Vis. Pattern Recognit.* (1994).
